# Supplementary material
Source: publisher figshare collection journal article supplement (https://acs.figshare.com/ndownloader/files/20168411)
Supplement: Supplementary file 1 [file 20168411]

## Sheet: Disease enrichment
Table S8: Disease term enrichment results hGPCRnet. Disease terms and gene-disease associations are from DisGeNET.
Disease	x	n	X	N	p-value	corr p-value
Schizophrenia	125	1044	498	8559	2.29e-16	3.09e-13
Substance Withdrawal Syndrome	24	54	498	8559	3.61e-16	3.09e-13
Mental Depression	50	262	498	8559	3.38e-14	1.93e-11
Bipolar Disorder	75	517	498	8559	4.95e-14	2.12e-11
Depressive disorder	65	417	498	8559	1.01e-13	3.47e-11
Alcoholic Intoxication, Chronic	48	292	498	8559	3.32e-11	9.49e-09
Unipolar Depression	39	256	498	8559	2.31e-08	5.64e-06
Major Depressive Disorder	38	262	498	8559	1.33e-07	2.85e-05
Status Epilepticus	19	83	498	8559	1.89e-07	3.6e-05
Squamous cell carcinoma	23	120	498	8559	3.17e-07	5.43e-05
Cocaine Dependence	13	44	498	8559	7.35e-07	0.000115
Anhedonia	10	27	498	8559	1.4e-06	0.000199
Marijuana Abuse	11	34	498	8559	1.95e-06	0.000257
Asthma, Aspirin-Induced	7	13	498	8559	2.73e-06	0.000299
Single major depressive episode	6	9	498	8559	2.72e-06	0.000299
Epilepsy, Temporal Lobe	9	23	498	8559	2.79e-06	0.000299
Alcohol abuse	12	44	498	8559	5.02e-06	0.000506
Uveal melanoma	6	10	498	8559	6.47e-06	0.000616
Abnormality of the urinary system	8	21	498	8559	1.29e-05	0.000959
Malignant melanoma of iris	4	4	498	8559	1.13e-05	0.000959
Dysgerminoma	5	7	498	8559	1.25e-05	0.000959
Subarachnoid Hemorrhage	5	7	498	8559	1.25e-05	0.000959
Thyroiditis	4	4	498	8559	1.13e-05	0.000959
Psychoses, Substance-Induced	7	17	498	8559	2.52e-05	0.0018
Severe depression	5	8	498	8559	3.16e-05	0.00217
Heart failure	24	169	498	8559	4.05e-05	0.00248
Anemia, Macrocytic	7	18	498	8559	3.92e-05	0.00248
Anemia, Diamond-Blackfan	7	18	498	8559	3.92e-05	0.00248
Mandibulofacial Dysostosis	4	5	498	8559	5.4e-05	0.00309
Ovarian papillary adenocarcinoma	4	5	498	8559	5.4e-05	0.00309
Parkinson Disease	13	64	498	8559	6.36e-05	0.00352
Acute Coronary Syndrome	9	33	498	8559	7.8e-05	0.00405
Mucosal telangiectasiae	6	14	498	8559	7.57e-05	0.00405
Malocclusion	12	57	498	8559	8.42e-05	0.00412
Angle class 2 malocclusion	12	57	498	8559	8.42e-05	0.00412
Hypoplasia of the maxilla	13	66	498	8559	8.9e-05	0.00424
Night blindness, stationary	5	10	498	8559	0.000129	0.00526
Pendular Nystagmus	6	15	498	8559	0.00012	0.00526
Night blindness, congenital stationary, complete	5	10	498	8559	0.000129	0.00526
Hyperthyroidism	6	15	498	8559	0.00012	0.00526
Oguchi disease	5	10	498	8559	0.000129	0.00526
Nystagmus, continuous pendular	6	15	498	8559	0.00012	0.00526
Varicocele	3	3	498	8559	0.000196	0.00645
Achromatopsia incomplete, X-linked	3	3	498	8559	0.000196	0.00645
Malignant melanoma of ciliary body	3	3	498	8559	0.000196	0.00645
Cocaine Abuse	6	16	498	8559	0.000183	0.00645
Malignant melanoma of choroid	3	3	498	8559	0.000196	0.00645
LONG QT SYNDROME 14	3	3	498	8559	0.000196	0.00645
Fibroadenoma of breast	3	3	498	8559	0.000196	0.00645
VENTRICULAR TACHYCARDIA, CATECHOLAMINERGIC POLYMORPHIC, 4	3	3	498	8559	0.000196	0.00645
LONG QT SYNDROME 15	3	3	498	8559	0.000196	0.00645
INCLUSION BODY MYOPATHY WITH EARLY-ONSET PAGET DISEASE AND FRONTOTEMPORAL DEMENTIA	3	3	498	8559	0.000196	0.00645
Cleft Palate	25	199	498	8559	0.000213	0.00687
Uranostaphyloschisis	22	167	498	8559	0.000256	0.00813
melanoma	26	216	498	8559	0.000318	0.0099
Dysphoric mood	4	7	498	8559	0.000344	0.0105
Hypoplasia of optic disc	5	12	498	8559	0.000368	0.0109
Malformations of Cortical Development	5	12	498	8559	0.000368	0.0109
Memory Disorders	9	40	498	8559	0.000384	0.0111
Breast Carcinoma	7	26	498	8559	0.00054	0.0154
Visceral angiomatosis	5	13	498	8559	0.000569	0.016
Pectus excavatum	15	100	498	8559	0.000619	0.0171
Congenital arteriovenous malformation	4	8	498	8559	0.000657	0.0179
Megalanecephaly Polymicrogyria-Polydactyly Hydrocephalus Syndrome	3	4	498	8559	0.000749	0.0183
Hemangioma, Cavernous	6	20	498	8559	0.000724	0.0183
Auriculo-condylar syndrome	3	4	498	8559	0.000749	0.0183
Acth-Independent Macronodular Adrenal Hyperplasia	3	4	498	8559	0.000749	0.0183
Hemeralopia	3	4	498	8559	0.000749	0.0183
Congenital macrodactylia	3	4	498	8559	0.000749	0.0183
Cone monochromatism	3	4	498	8559	0.000749	0.0183
Acute kidney injury	12	73	498	8559	0.000936	0.0226
SPINOCEREBELLAR ATAXIA 17	4	9	498	8559	0.00113	0.0268
Night blindness, congenital stationary	5	15	498	8559	0.0012	0.0283
Diabetes Mellitus, Experimental	15	107	498	8559	0.00127	0.0293
Reperfusion Injury	13	86	498	8559	0.00131	0.0298
Squamous cell carcinoma of the head and neck	7	30	498	8559	0.00136	0.0307
Osteoporosis	20	165	498	8559	0.0014	0.0311
Seasonal Affective Disorder	5	16	498	8559	0.00167	0.0342
NEVUS, EPIDERMAL (disorder)	3	5	498	8559	0.00179	0.0342
Bicuspid aortic valve	5	16	498	8559	0.00167	0.0342
Pseudohypoparathyroidism	3	5	498	8559	0.00179	0.0342
Strawberry nevus of skin	4	10	498	8559	0.00179	0.0342
Organic writer's cramp	4	10	498	8559	0.00179	0.0342
Endometrial Hyperplasia	3	5	498	8559	0.00179	0.0342
Abnormality of macular pigmentation	5	16	498	8559	0.00167	0.0342
Leukemia, T-Cell	3	5	498	8559	0.00179	0.0342
Adult T-Cell Lymphoma/Leukemia	7	31	498	8559	0.00168	0.0342
LEOPARD Syndrome	3	5	498	8559	0.00179	0.0342
Glossoptosis	4	10	498	8559	0.00179	0.0342
Pancreatic Neoplasm	13	88	498	8559	0.00162	0.0342
Intermittent migraine headaches	12	79	498	8559	0.0019	0.0357
Transitional cell carcinoma of bladder	5	17	498	8559	0.00225	0.042
Myocardial Ischemia	20	172	498	8559	0.00231	0.0425
Brain Ischemia	13	92	498	8559	0.00244	0.0444
Pseudopseudohypoparathyroidism	2	2	498	8559	0.00338	0.0449
McCune-Albright Syndrome	2	2	498	8559	0.00338	0.0449
Syndactyly	8	42	498	8559	0.00253	0.0449
Albright's hereditary osteodystrophy	2	2	498	8559	0.00338	0.0449
Frontometaphyseal dysplasia	2	2	498	8559	0.00338	0.0449
Proteus Syndrome	2	2	498	8559	0.00338	0.0449
Hypocalcemic tetany	2	2	498	8559	0.00338	0.0449
Streptococcal pneumonia	3	6	498	8559	0.00343	0.0449
Pseudohypoparathyroidism, Type Ia	2	2	498	8559	0.00338	0.0449
Acquired cubitus valgus	5	18	498	8559	0.00297	0.0449
Phakomatosis cesioflammea	2	2	498	8559	0.00338	0.0449
HYPOCALCEMIA, AUTOSOMAL DOMINANT 1	2	2	498	8559	0.00338	0.0449
Paranoid Schizophrenia	5	18	498	8559	0.00297	0.0449
Laryngeal calcification	2	2	498	8559	0.00338	0.0449
Pseudohypoparathyroidism Type 1C	2	2	498	8559	0.00338	0.0449
Melanocytic nevus	8	43	498	8559	0.00296	0.0449
Growth Hormone-Secreting Pituitary Adenoma	3	6	498	8559	0.00343	0.0449
MICROCEPHALY AND CHORIORETINOPATHY, AUTOSOMAL RECESSIVE, 1	2	2	498	8559	0.00338	0.0449
Hyperphosphatemia (disorder)	5	18	498	8559	0.00297	0.0449
Mandibular hypoplasia	28	276	498	8559	0.00279	0.0449
Thyrotoxicosis due to pituitary thyroid hormone resistance	2	2	498	8559	0.00338	0.0449
Cafe au lait spots, multiple	5	18	498	8559	0.00297	0.0449
Hypoplastic mandible condyle	28	276	498	8559	0.00279	0.0449
Micrognathism	28	276	498	8559	0.00279	0.0449
CEROID LIPOFUSCINOSIS, NEURONAL, 6	3	6	498	8559	0.00343	0.0449
Short distal phalanx of hallux	2	2	498	8559	0.00338	0.0449
Osteoma	2	2	498	8559	0.00338	0.0449
Polyostotic fibrous dysplasia	2	2	498	8559	0.00338	0.0449
Failure of development of condylar neck of mandible	2	2	498	8559	0.00338	0.0449
Familial cold urticaria	2	2	498	8559	0.00338	0.0449
Irregular metacarpals	2	2	498	8559	0.00338	0.0449
Lymphangioma	2	2	498	8559	0.00338	0.0449
Failure of development of condylar head of mandible	2	2	498	8559	0.00338	0.0449
Endogenous depression	3	6	498	8559	0.00343	0.0449
Fibrous Dysplasia, Monostotic	2	2	498	8559	0.00338	0.0449
Osteoma cutis	2	2	498	8559	0.00338	0.0449
COLORBLINDNESS, PARTIAL, DEUTAN SERIES	2	2	498	8559	0.00338	0.0449
Micronodular cirrhosis	4	12	498	8559	0.00385	0.0496
Trigeminal Neuralgia	4	12	498	8559	0.00385	0.0496

## Sheet: Disease enrichment (Cell-type)
Table S9: Disease term enrichment results per cell type. Disease terms and gene-disease associations are from DisGeNET. The results are separated by the name of the cell type with a leading (#)-pound sign.
#adrenal gland glandular cells
Disease Name	p-value	corr p-value
Myocardial Ischemia	0.000102045	0.00424705
Proteus Syndrome	0.000796227	0.0115907
Congenital macrodactylia	8.74564e-05	0.00386826
Uveal melanoma	0.000114486	0.00424705
Multiple lentigines	0.00231209	0.0236458
Frontal bossing	0.00048957	0.0100537
Polyostotic fibrous dysplasia	0.000796227	0.0115907
Meningioma	0.00361417	0.0349269
Megalanecephaly Polymicrogyria-Polydactyly Hydrocephalus Syndrome	0.00460058	0.0403868
Congenital Epicanthus	0.00455356	0.0403868
Reperfusion Injury	2.76775e-05	0.00212194
Anomalous pulmonary artery	0.00460058	0.0403868
Syndactyly of fingers	0.000362421	0.00806099
INCLUSION BODY MYOPATHY WITH EARLY-ONSET PAGET DISEASE AND FRONTOTEMPORAL DEMENTIA	2.2332e-05	0.00189172
Port-Wine Stain	0.00112529	0.0150474
Hemangioma, Cavernous	0.00018981	0.00586135
LONG QT SYNDROME 15	2.2332e-05	0.00189172
NEVUS, EPIDERMAL (disorder)	0.000214067	0.00586135
Severe depression	3.9912e-05	0.00237386
Liver carcinoma	0.00148538	0.0185672
Substance Withdrawal Syndrome	0.000754893	0.0115907
Dermoid choristoma of eye proper	0.00234402	0.0236458
Anhedonia	0.000840777	0.0120862
Depressive disorder	6.6569e-07	0.000382772
Strawberry nevus of skin	0.000114486	0.00424705
Hypothyroidism	0.00269237	0.0268717
Malignant melanoma of iris	8.74564e-05	0.00386826
Malignant Peripheral Nerve Sheath Tumor	0.00460058	0.0403868
Malignant melanoma of choroid	2.2332e-05	0.00189172
Hamartoma Syndrome, Multiple	0.00231209	0.0236458
Short fifth metatarsal	0.00234402	0.0236458
Squamous cell carcinoma of the head and neck	0.000161198	0.00545229
Anemia, Diamond-Blackfan	0.00139544	0.0178307
Cleft Palate	0.000503561	0.0101596
Hyperthyroidism	4.12846e-05	0.00237386
Pseudohypoparathyroidism Type 1B	0.00234402	0.0236458
Cafe au lait spots, multiple	0.00010987	0.00424705
Squamous cell carcinoma	2.29467e-07	0.000263887
VENTRICULAR TACHYCARDIA, CATECHOLAMINERGIC POLYMORPHIC, 1 (disorder)	0.000718271	0.0115907
Cardiac Arrest	0.00406485	0.0383162
Osteoma	0.000796227	0.0115907
Hyperphosphatemia (disorder)	0.00139544	0.0178307
Transitional cell carcinoma of bladder	0.00110976	0.0150474
Visceral angiomatosis	0.000364497	0.00806099
Angle class 2 malocclusion	0.000181463	0.00579674
Vascular ring	0.00234402	0.0236458
Fibroadenoma of breast	2.2332e-05	0.00189172
Liposarcoma, Dedifferentiated	0.00234402	0.0236458
Leiomyosarcoma of uterus	0.00517495	0.0437588
Diverticular disease of colon	0.000665479	0.0115907
Constrictive median neuropathy	0.00234402	0.0236458
Varicocele	2.2332e-05	0.00189172
Pseudohypoparathyroidism	0.000214067	0.00586135
T-Cell Lymphoma	0.00517495	0.0437588
Leukemia, T-Cell	0.000214067	0.00586135
Ovarian papillary adenocarcinoma	0.000214067	0.00586135
Abnormality of the penis	0.000718271	0.0115907
Hypocalcemic tetany	0.000796227	0.0115907
Angioid Streaks	0.000718271	0.0115907
Ki-1+ Anaplastic Large Cell Lymphoma	0.00460058	0.0403868
Pectus excavatum	2.30296e-05	0.00189172
Testicular Hydrocele	0.00112529	0.0150474
Breast Carcinoma	0.000701056	0.0115907
Malocclusion	0.000181463	0.00579674
Thrombophlebitis	0.00234402	0.0236458
Hypoplasia of the maxilla	1.42271e-05	0.00189172
Tachycardia, Ventricular	0.00424213	0.0396622
SPINOCEREBELLAR ATAXIA 17	7.02482e-05	0.00352782
Pseudohypoparathyroidism, Type Ia	0.000796227	0.0115907
Anemia, Macrocytic	0.00139544	0.0178307
Albright's hereditary osteodystrophy	0.000796227	0.0115907
Low set ears	0.00183283	0.0219558
Acute Coronary Syndrome	3.01757e-05	0.00216888
Congenital bronchogenic cyst	0.00234402	0.0236458
Congenital arteriovenous malformation	3.9912e-05	0.00237386
Pseudopseudohypoparathyroidism	0.000796227	0.0115907
Micrognathism	0.000296681	0.0069764
Upper limb asymmetry	0.00234402	0.0236458
Melanocytic nevus	0.00121757	0.0160943
Subcutaneous lipomas	0.00165281	0.0200077
Hamartomatous polyp	0.00231209	0.0236458
Ovarian Cysts	0.00107263	0.0150474
Dysgerminoma	2.0409e-05	0.00189172
Malformations of Cortical Development	0.00406485	0.0383162
Micronodular cirrhosis	0.00406485	0.0383162
Fibrous Dysplasia, Monostotic	0.000796227	0.0115907
Polyp of large intestine	0.00112529	0.0150474
Lymphangioma	0.000796227	0.0115907
BREAST-OVARIAN CANCER, FAMILIAL, SUSCEPTIBILITY TO, 1	0.00517495	0.0437588
Thyroid Gland Follicular Adenoma	0.00165281	0.0200077
Benign neoplasm of eye, unspecified	0.00234402	0.0236458
Multiple, subcutaneous nodules	0.00014038	0.00504489
Abnormality of the urinary system	0.000243425	0.00636226
Single major depressive episode	0.00165281	0.0200077
Mental Depression	4.96364e-05	0.00271818
Thyroiditis	8.74564e-05	0.00386826
Pancreatic Neoplasm	0.00333194	0.0324723
Streptococcal pneumonia	0.000419188	0.00876483
Bipolar Disorder	0.000297255	0.0069764
Acquired cubitus valgus	0.00010987	0.00424705
Hypoplastic mandible condyle	0.000296681	0.0069764
Intestinal Polyposis	0.000718271	0.0115907
Uterine Cervical Neoplasm	0.00571046	0.0479345
Hyperparathyroidism	0.00517495	0.0437588
Endogenous depression	0.000419188	0.00876483
Uranostaphyloschisis	0.00271053	0.0268717
Lymphedema	0.00305246	0.0300028
Syndactyly	0.000153398	0.00534569
LEOPARD Syndrome	0.000214067	0.00586135
Liposarcoma, well differentiated	0.00234402	0.0236458
Thyrotoxicosis due to pituitary thyroid hormone resistance	0.000796227	0.0115907
Acute kidney injury	0.0044133	0.0403868
Osteoma cutis	0.000796227	0.0115907
Parkinson Disease	7.05565e-05	0.00352782
Pseudohypoparathyroidism Type 1C	0.000796227	0.0115907
Congenital clinodactyly	0.00142605	0.0180215
Hip Dysplasia	0.00234402	0.0236458
Senile lentigo	0.00231209	0.0236458
Mandibular hypoplasia	0.000296681	0.0069764
melanoma	3.80082e-05	0.00237386
Acth-Independent Macronodular Adrenal Hyperplasia	0.00460058	0.0403868
Brain Ischemia	0.00438207	0.0403868
Osteoporosis	0.000231823	0.00619992
Pseudohypoaldosteronism	0.00517495	0.0437588
LONG QT SYNDROME 14	2.2332e-05	0.00189172
McCune-Albright Syndrome	0.000796227	0.0115907
Phencyclidine Abuse	0.00112529	0.0150474
Conjunctival hamartoma	0.000718271	0.0115907
Malignant melanoma of ciliary body	2.2332e-05	0.00189172
CEROID LIPOFUSCINOSIS, NEURONAL, 6	0.000419188	0.00876483
Marijuana Abuse	0.000332136	0.00763913
Retinal Detachment	0.00215314	0.0236458
Schizophrenia	5.55955e-06	0.00189172
Trigeminal Neuralgia	0.000258047	0.00659454
Phakomatosis cesioflammea	0.000796227	0.0115907
Gastrointestinal hamartomatous polyps	0.00231209	0.0236458
VENTRICULAR TACHYCARDIA, CATECHOLAMINERGIC POLYMORPHIC, 4	2.2332e-05	0.00189172
#appendix glandular cells
Disease Name	p-value	corr p-value
Ovarian papillary adenocarcinoma	2.75809e-06	0.000440506
Abnormality of the penis	0.000667375	0.0112867
Varicocele	2.07052e-05	0.0013615
T-Cell Lymphoma	0.00482349	0.0393625
Lymphangioma, Cystic	0.00233027	0.0226543
Pseudohypoparathyroidism	0.000198686	0.00528882
Leukemia, T-Cell	0.000198686	0.00528882
Breast Carcinoma	5.97412e-05	0.00256887
Pectus excavatum	9.03898e-05	0.0030623
Testicular Hydrocele	0.0010461	0.0140909
Malocclusion	0.00462134	0.0391413
Hypoplasia of the maxilla	1.56418e-06	0.000291458
Thrombophlebitis	0.00223005	0.0218702
Tachycardia, Ventricular	0.00387781	0.0352471
Hypocalcemic tetany	0.000757155	0.0112867
Abnormal lung lobation	0.00215167	0.0218702
Angioid Streaks	0.000667375	0.0112867
Ki-1+ Anaplastic Large Cell Lymphoma	0.00437898	0.0378545
VENTRICULAR TACHYCARDIA, CATECHOLAMINERGIC POLYMORPHIC, 1 (disorder)	0.000667375	0.0112867
Cardiac Arrest	0.0037868	0.0349887
Squamous cell carcinoma	7.36577e-11	8.23493e-08
Hyperphosphatemia (disorder)	0.00127136	0.0159705
Osteoma	0.000757155	0.0112867
Transitional cell carcinoma of bladder	0.00101051	0.0140909
Cleft Palate	0.00118523	0.0155892
Hyperthyroidism	3.65925e-05	0.00177871
Cafe au lait spots, multiple	9.75552e-05	0.00320785
Pseudohypoparathyroidism Type 1B	0.00223005	0.0218702
Diverticular disease of colon	0.000605285	0.0112867
Mandibulofacial Dysostosis	0.000198686	0.00528882
Constrictive median neuropathy	0.00223005	0.0218702
Angle class 2 malocclusion	0.00462134	0.0391413
Visceral angiomatosis	0.00482349	0.0393625
Vascular ring	0.00223005	0.0218702
Fibroadenoma of breast	2.07052e-05	0.0013615
Liposarcoma, Dedifferentiated	0.00223005	0.0218702
Leiomyosarcoma of uterus	0.00482349	0.0393625
Strawberry nevus of skin	0.000103836	0.00331683
Depressive disorder	3.60703e-06	0.000448073
Severe depression	3.61582e-05	0.00177871
NEVUS, EPIDERMAL (disorder)	0.000198686	0.00528882
Liver carcinoma	4.17143e-05	0.00194319
Substance Withdrawal Syndrome	0.00065042	0.0112867
Dermoid choristoma of eye proper	0.00223005	0.0218702
Hyperkyphosis	0.00440168	0.0378545
Short fifth metatarsal	0.00223005	0.0218702
Anemia, Diamond-Blackfan	0.00127136	0.0159705
Squamous cell carcinoma of the head and neck	0.00123849	0.0159705
Hypothyroidism	0.00237424	0.0228828
Malignant melanoma of iris	5.63851e-07	0.000157596
Malignant Peripheral Nerve Sheath Tumor	0.00437898	0.0378545
Malignant melanoma of choroid	2.07052e-05	0.0013615
Hamartoma Syndrome, Multiple	0.00215167	0.0218702
Congenital macrodactylia	8.11291e-05	0.00283445
Uveal melanoma	3.43925e-06	0.000448073
Multiple lentigines	0.00215167	0.0218702
Frontal bossing	0.000385034	0.00870422
Myocardial Ischemia	7.68669e-05	0.00277217
Proteus Syndrome	0.000757155	0.0112867
Anomalous pulmonary artery	0.00437898	0.0378545
Reperfusion Injury	2.19204e-05	0.0013615
Hemangioma, Cavernous	0.000168733	0.00509849
Port-Wine Stain	0.0010461	0.0140909
INCLUSION BODY MYOPATHY WITH EARLY-ONSET PAGET DISEASE AND FRONTOTEMPORAL DEMENTIA	2.07052e-05	0.0013615
Syndactyly of fingers	0.00191933	0.0218702
LONG QT SYNDROME 15	2.07052e-05	0.0013615
Meningioma	0.00330196	0.0315521
Polyostotic fibrous dysplasia	0.000757155	0.0112867
Megalanecephaly Polymicrogyria-Polydactyly Hydrocephalus Syndrome	0.00437898	0.0378545
Pseudohypoaldosteronism	0.00482349	0.0393625
LONG QT SYNDROME 14	2.07052e-05	0.0013615
Senile lentigo	0.00215167	0.0218702
melanoma	2.7196e-05	0.00160027
Mandibular hypoplasia	7.23884e-05	0.00269767
Acth-Independent Macronodular Adrenal Hyperplasia	0.00437898	0.0378545
Osteoporosis	0.000620341	0.0112867
Brain Ischemia	0.000208554	0.00542242
Marijuana Abuse	0.000290127	0.00690132
Trigeminal Neuralgia	0.000234309	0.00582128
Schizophrenia	1.09678e-06	0.00024524
Phakomatosis cesioflammea	0.000757155	0.0112867
Gastrointestinal hamartomatous polyps	0.00215167	0.0218702
VENTRICULAR TACHYCARDIA, CATECHOLAMINERGIC POLYMORPHIC, 4	2.07052e-05	0.0013615
Atherosclerosis	0.00595485	0.0472165
McCune-Albright Syndrome	0.000757155	0.0112867
Conjunctival hamartoma	0.000667375	0.0112867
Phencyclidine Abuse	0.0010461	0.0140909
Malignant melanoma of ciliary body	2.07052e-05	0.0013615
CEROID LIPOFUSCINOSIS, NEURONAL, 6	0.000389277	0.00870422
Intestinal Polyposis	0.000667375	0.0112867
Hypoplastic mandible condyle	7.23884e-05	0.00269767
Bipolar Disorder	0.000443367	0.00971929
Uterine Cervical Neoplasm	0.00522579	0.0420319
Asbestosis	0.0037868	0.0349887
Single major depressive episode	0.00153732	0.0186818
Mental Depression	3.46937e-05	0.00177871
Thyroiditis	5.63851e-07	0.000157596
Pancreatic Neoplasm	0.00014374	0.00446393
Acute kidney injury	0.00384603	0.0352448
Osteoma cutis	0.000757155	0.0112867
Parkinson Disease	5.80752e-05	0.00256887
Congenital clinodactyly	0.00595485	0.0472165
Pseudohypoparathyroidism Type 1C	0.000757155	0.0112867
Hip Dysplasia	0.00223005	0.0218702
Mucosal telangiectasiae	0.000453634	0.00975312
Endogenous depression	0.000389277	0.00870422
Uranostaphyloschisis	0.0022019	0.0218702
Lymphedema	0.000273958	0.00665838
Syndactyly	0.00094144	0.013494
LEOPARD Syndrome	0.000198686	0.00528882
Cholangiocarcinoma	0.00522579	0.0420319
Liposarcoma, well differentiated	0.00223005	0.0218702
Thyrotoxicosis due to pituitary thyroid hormone resistance	0.000757155	0.0112867
Fibrous Dysplasia, Monostotic	0.000757155	0.0112867
Polyp of large intestine	0.0010461	0.0140909
Lymphangioma	0.000757155	0.0112867
Thyroid Gland Follicular Adenoma	0.00153732	0.0186818
BREAST-OVARIAN CANCER, FAMILIAL, SUSCEPTIBILITY TO, 1	0.00482349	0.0393625
Benign neoplasm of eye, unspecified	0.00223005	0.0218702
Hamartomatous polyp	0.00215167	0.0218702
Ovarian Cysts	0.00094144	0.013494
Micronodular cirrhosis	0.0037868	0.0349887
Malformations of Cortical Development	0.0037868	0.0349887
Dysgerminoma	3.06822e-07	0.000157596
Bicuspid aortic valve	0.000789702	0.0116169
Abnormality of the urinary system	0.000216522	0.00550164
Multiple, subcutaneous nodules	0.000728074	0.0112867
Albright's hereditary osteodystrophy	0.000757155	0.0112867
Low set ears	0.00426162	0.0378545
Acute Coronary Syndrome	0.00192857	0.0218702
Hereditary Diffuse Gastric Cancer	0.00223005	0.0218702
SPINOCEREBELLAR ATAXIA 17	6.36775e-05	0.00263672
Pseudohypoparathyroidism, Type Ia	0.000757155	0.0112867
Anemia, Macrocytic	0.00127136	0.0159705
Pseudopseudohypoparathyroidism	0.000757155	0.0112867
Micrognathism	7.23884e-05	0.00269767
Upper limb asymmetry	0.00223005	0.0218702
Melanocytic nevus	0.00106928	0.0142316
Subcutaneous lipomas	0.00153732	0.0186818
Congenital bronchogenic cyst	0.00223005	0.0218702
Congenital arteriovenous malformation	3.61582e-05	0.00177871
#appendix lymphoid tissue
Disease Name	p-value	corr p-value
Senile lentigo	0.000937554	0.0220897
Adult T-Cell Lymphoma/Leukemia	3.44238e-05	0.00221689
Varicocele	0.00125849	0.0253271
melanoma	0.00170997	0.0300333
Lymphangioma, Cystic	0.000803374	0.0204226
T-Cell Lymphoma	0.00213457	0.0344326
Mandibular hypoplasia	0.000183283	0.00680968
Osteoporosis	0.000604944	0.0166965
Brain Ischemia	0.000112252	0.0051636
LONG QT SYNDROME 14	8.69775e-06	0.000933559
Ovarian papillary adenocarcinoma	8.43458e-05	0.0040739
Phencyclidine Abuse	0.000451111	0.0128169
Malignant melanoma of ciliary body	8.69775e-06	0.000933559
CEROID LIPOFUSCINOSIS, NEURONAL, 6	0.000166123	0.00680968
Marijuana Abuse	5.97241e-05	0.0030365
Breast Carcinoma	0.00185137	0.0313759
Trigeminal Neuralgia	0.00166718	0.0298241
Pectus excavatum	0.00105275	0.0236501
Schizophrenia	0.00125176	0.0253271
Phakomatosis cesioflammea	0.000425295	0.0128169
Hypoplasia of the maxilla	5.89617e-05	0.0030365
Tachycardia, Ventricular	0.00135897	0.0267911
VENTRICULAR TACHYCARDIA, CATECHOLAMINERGIC POLYMORPHIC, 4	8.69775e-06	0.000933559
Asbestosis	0.00166718	0.0298241
Cleft Palate	0.00023692	0.00847646
Mental Depression	2.79808e-05	0.00221689
Romano-Ward Syndrome	0.00329413	0.0461178
Thyroiditis	3.42604e-05	0.00221689
Cardiac Arrest	0.00166718	0.0298241
VENTRICULAR TACHYCARDIA, CATECHOLAMINERGIC POLYMORPHIC, 1 (disorder)	0.000286294	0.00987716
Squamous cell carcinoma	2.13411e-08	2.06155e-05
Degenerative polyarthritis	0.00302366	0.0449362
Hypoplastic mandible condyle	0.000183283	0.00680968
Uranostaphyloschisis	0.000669279	0.017959
Lymphedema	0.000966181	0.0222222
Liposarcoma, Dedifferentiated	0.00125849	0.0253271
Fibroadenoma of breast	0.00125849	0.0253271
Liposarcoma, well differentiated	0.00125849	0.0253271
Diverticular disease of colon	0.00329413	0.0461178
Mucosal telangiectasiae	0.00015048	0.00660742
Severe depression	0.000451111	0.0128169
Ovarian Cysts	0.00163589	0.0298241
Liver carcinoma	4.27958e-05	0.0025838
Micronodular cirrhosis	0.00166718	0.0298241
Dysgerminoma	5.89544e-06	0.000933559
Anhedonia	0.00213867	0.0344326
Depressive disorder	1.49635e-05	0.00144547
BREAST-OVARIAN CANCER, FAMILIAL, SUSCEPTIBILITY TO, 1	0.00213457	0.0344326
Malignant melanoma of iris	1.76883e-07	8.54344e-05
Malignant Peripheral Nerve Sheath Tumor	0.00248272	0.0374736
Malignant melanoma of choroid	8.69775e-06	0.000933559
Abnormality of the urinary system	0.000803374	0.0204226
Squamous cell carcinoma of the head and neck	0.000334785	0.0111518
Myocardial Ischemia	0.000855458	0.021189
SPINOCEREBELLAR ATAXIA 17	2.05438e-05	0.00180412
Agyria	0.00329413	0.0461178
Uveal melanoma	3.36875e-05	0.00221689
Congenital macrodactylia	0.00248272	0.0374736
Multiple lentigines	0.000937554	0.0220897
Acute Coronary Syndrome	5.00355e-05	0.0028432
Congenital arteriovenous malformation	0.000451111	0.0128169
Megalanecephaly Polymicrogyria-Polydactyly Hydrocephalus Syndrome	0.00248272	0.0374736
Lissencephaly	0.00329413	0.0461178
Anomalous pulmonary artery	0.00248272	0.0374736
Micrognathism	0.000183283	0.00680968
Port-Wine Stain	0.000451111	0.0128169
INCLUSION BODY MYOPATHY WITH EARLY-ONSET PAGET DISEASE AND FRONTOTEMPORAL DEMENTIA	8.69775e-06	0.000933559
LONG QT SYNDROME 15	8.69775e-06	0.000933559
Melanocytic nevus	0.00182061	0.0313759
#bone marrow hematopoietic cells
Disease Name	p-value	corr p-value
Osteoma	0.000681958	0.01187
Squamous cell carcinoma	1.71401e-09	2.05853e-06
Cardiac Arrest	0.00326687	0.0332501
VENTRICULAR TACHYCARDIA, CATECHOLAMINERGIC POLYMORPHIC, 1 (disorder)	0.000572713	0.01187
Microstomia	0.0009417	0.0146881
Cleft Palate	1.69562e-05	0.00155209
Hyperthyroidism	2.846e-05	0.00201062
Cafe au lait spots, multiple	7.61429e-05	0.00415671
Pseudohypoparathyroidism Type 1B	0.00201049	0.0223574
Mesomelia	0.00132206	0.0189023
Diverticular disease of colon	0.000496746	0.01187
Constrictive median neuropathy	0.00201049	0.0223574
Angle class 2 malocclusion	1.47925e-05	0.00155209
Visceral angiomatosis	0.00027116	0.00814157
Vascular ring	0.00201049	0.0223574
Fibroadenoma of breast	1.76925e-05	0.00155209
Abnormality of the penis	0.000572713	0.01187
Ovarian papillary adenocarcinoma	0.000170141	0.00552267
Prominent epicanthal folds	0.00201049	0.0223574
Leukemia, T-Cell	0.000170141	0.00552267
Adult T-Cell Lymphoma/Leukemia	0.000127852	0.00511425
Varicocele	1.76925e-05	0.00155209
Pseudohypoparathyroidism	0.000170141	0.00552267
T-Cell Lymphoma	0.00416558	0.0390848
Breast Carcinoma	0.00049272	0.01187
Testicular Hydrocele	0.000898676	0.0143606
Pectus excavatum	0.00118202	0.017526
Malocclusion	1.47925e-05	0.00155209
Hypoplasia of the maxilla	9.34625e-07	0.000374162
Thrombophlebitis	0.00201049	0.0223574
Tachycardia, Ventricular	0.00321454	0.0332501
Angioid Streaks	0.000572713	0.01187
Hypocalcemic tetany	0.000681958	0.01187
Abnormal lung lobation	0.00185234	0.0223574
Frontal bossing	5.98633e-05	0.00359479
Uveal melanoma	0.00185234	0.0223574
Congenital macrodactylia	6.9399e-05	0.00396896
Proteus Syndrome	0.000681958	0.01187
Myocardial Ischemia	0.000160169	0.00552267
Hemangioma, Cavernous	0.000132008	0.00511425
Syndactyly of fingers	0.000226065	0.00696164
INCLUSION BODY MYOPATHY WITH EARLY-ONSET PAGET DISEASE AND FRONTOTEMPORAL DEMENTIA	1.76925e-05	0.00155209
LONG QT SYNDROME 15	1.76925e-05	0.00155209
Abnormal ossification involving bones of the feet	0.00201049	0.0223574
Meningioma	0.00273416	0.0295831
Polyostotic fibrous dysplasia	0.000681958	0.01187
Megalanecephaly Polymicrogyria-Polydactyly Hydrocephalus Syndrome	0.00395158	0.0385841
Strawberry nevus of skin	0.00185234	0.0223574
Osteosclerosis	0.00321454	0.0332501
Depressive disorder	0.000557247	0.01187
Asthma, Aspirin-Induced	0.00416558	0.0390848
Liver carcinoma	0.000652749	0.01187
Substance Withdrawal Syndrome	0.000476048	0.01187
Severe depression	0.000898676	0.0143606
NEVUS, EPIDERMAL (disorder)	0.000170141	0.00552267
Anhedonia	0.000591951	0.01187
Hyperkyphosis	0.0031187	0.0332501
Dermoid choristoma of eye proper	0.00201049	0.0223574
Short fifth metatarsal	0.00201049	0.0223574
Congenital deafness	0.00364507	0.0366468
Anemia, Diamond-Blackfan	0.00104689	0.0157165
Squamous cell carcinoma of the head and neck	0.000105388	0.00465497
Ulcerative Colitis	0.00462882	0.0427632
Malignant melanoma of iris	0.00395158	0.0385841
Hypothyroidism	0.00182412	0.0223574
Hamartoma Syndrome, Multiple	0.00185234	0.0223574
Glossoptosis	0.00185234	0.0223574
Hypoplastic mandible condyle	0.000108526	0.00465497
Intestinal Polyposis	0.000572713	0.01187
Bipolar Disorder	0.000976894	0.0150417
Uterine Cervical Neoplasm	0.00434151	0.0404198
Laryngeal calcification	0.000681958	0.01187
Hyperparathyroidism	0.00416558	0.0390848
Thyroiditis	4.56994e-07	0.000274425
Streptococcal pneumonia	0.000333705	0.00954238
Pneumonia	0.00221924	0.0244524
Mental Depression	0.00139214	0.0194414
Osteoma cutis	0.000681958	0.01187
Pseudohypoparathyroidism Type 1C	0.000681958	0.01187
Mucosal telangiectasiae	1.93849e-05	0.00155209
Parkinson Disease	0.00133871	0.0189152
Endogenous depression	0.000333705	0.00954238
Syndactyly	9.46384e-05	0.00465497
Thyrotoxicosis due to pituitary thyroid hormone resistance	0.000681958	0.01187
Uranostaphyloschisis	0.000116986	0.00484485
Lymphedema	0.00230538	0.0251706
LONG QT SYNDROME 14	1.76925e-05	0.00155209
Pseudohypoaldosteronism	0.00416558	0.0390848
Acth-Independent Macronodular Adrenal Hyperplasia	0.00395158	0.0385841
Osteoporosis	0.000102784	0.00465497
Brain Ischemia	0.000646536	0.01187
melanoma	0.00157672	0.021766
Mandibular hypoplasia	0.000108526	0.00465497
Trigeminal Neuralgia	0.00326687	0.0332501
Schizophrenia	2.62962e-05	0.00197386
Marijuana Abuse	0.000218712	0.00691245
Abnormal foot bone ossification	0.00201049	0.0223574
VENTRICULAR TACHYCARDIA, CATECHOLAMINERGIC POLYMORPHIC, 4	1.76925e-05	0.00155209
Gastrointestinal hamartomatous polyps	0.00185234	0.0223574
McCune-Albright Syndrome	0.000681958	0.01187
Conjunctival hamartoma	0.000572713	0.01187
Phencyclidine Abuse	0.000898676	0.0143606
Albright's hereditary osteodystrophy	0.000681958	0.01187
Acute Coronary Syndrome	1.83105e-05	0.00155209
Low set ears	0.000908747	0.0143606
Sezary Syndrome	0.00499361	0.0457811
Anemia, Macrocytic	0.00104689	0.0157165
SPINOCEREBELLAR ATAXIA 17	5.19055e-05	0.00328097
Pseudohypoparathyroidism, Type Ia	0.000681958	0.01187
Micrognathism	0.000108526	0.00465497
Pseudopseudohypoparathyroidism	0.000681958	0.01187
Subcutaneous lipomas	0.00132206	0.0189023
Upper limb asymmetry	0.00201049	0.0223574
Congenital bronchogenic cyst	0.00201049	0.0223574
Congenital arteriovenous malformation	0.000898676	0.0143606
Polyp of large intestine	0.000898676	0.0143606
Lymphangioma	0.000681958	0.01187
Fibrous Dysplasia, Monostotic	0.000681958	0.01187
Benign neoplasm of eye, unspecified	0.00201049	0.0223574
Thyroid Gland Follicular Adenoma	0.00132206	0.0189023
BREAST-OVARIAN CANCER, FAMILIAL, SUSCEPTIBILITY TO, 1	0.00416558	0.0390848
Congenital ocular coloboma (disorder)	0.00366163	0.0366468
Malformations of Cortical Development	0.00326687	0.0332501
Micronodular cirrhosis	0.00326687	0.0332501
Dysgerminoma	1.50285e-05	0.00155209
Hamartomatous polyp	0.00185234	0.0223574
Ovarian Cysts	0.000716504	0.0122932
Bicuspid aortic valve	4.05179e-05	0.00270345
Abnormality of the urinary system	0.000169594	0.00552267
Multiple, subcutaneous nodules	0.000533529	0.01187
Cor pulmonale	0.00201049	0.0223574
#breast adipocytes
Disease Name	p-value	corr p-value
Hypoplastic mandible condyle	0.003442	0.0485851
Degenerative polyarthritis	0.00193716	0.0418198
Squamous cell carcinoma	5.55561e-10	4.07781e-07
Cleft Palate	0.000346274	0.0222093
Microstomia	0.00168869	0.0418198
Streptococcal pneumonia	0.00177636	0.0418198
Thyroiditis	0.000720931	0.0278507
Mucosal telangiectasiae	0.00044129	0.0249159
Mandibulofacial Dysostosis	0.00119286	0.0350224
Diverticular disease of colon	0.000547187	0.0278507
Vascular ring	0.000363094	0.0222093
Syndactyly	0.00115439	0.0350224
Fibroadenoma of breast	0.000363094	0.0222093
Congenital hemihypertrophy	0.00326817	0.0485851
Uranostaphyloschisis	0.00248611	0.0445075
Leukemia, Myelocytic, Acute	0.00229366	0.0445075
Heart failure	0.0026583	0.0453765
Abnormality of the penis	0.00246894	0.0445075
Ovarian papillary adenocarcinoma	0.00119286	0.0350224
Brain Ischemia	6.74899e-05	0.00990751
Leukemia, T-Cell	0.00119286	0.0350224
Aortic valve calcification	0.00119286	0.0350224
T-Cell Lymphoma	0.000349534	0.0222093
Glioblastoma	0.00159424	0.041792
Mandibular hypoplasia	0.003442	0.0485851
Varicocele	0.000363094	0.0222093
Testicular Hydrocele	0.00326817	0.0485851
Breast Carcinoma	0.00286232	0.0477487
ovarian neoplasm	0.000130021	0.0159059
Macrocephaly	0.00326817	0.0485851
Hypoplasia of the maxilla	5.79085e-07	0.000212524
Conjunctival hamartoma	0.00246894	0.0445075
Angioid Streaks	0.00246894	0.0445075
CEROID LIPOFUSCINOSIS, NEURONAL, 6	0.00177636	0.0418198
Acute Coronary Syndrome	2.81229e-05	0.00516054
Congenital macrodactylia	0.000720931	0.0278507
INCLUSION BODY MYOPATHY WITH EARLY-ONSET PAGET DISEASE AND FRONTOTEMPORAL DEMENTIA	1.32501e-06	0.000324185
Syndactyly of fingers	0.00190759	0.0418198
Micrognathism	0.003442	0.0485851
Hemangioma, Cavernous	0.00131692	0.0371776
Reperfusion Injury	0.00259873	0.0453765
Meningioma	0.00199715	0.0418831
Megalanecephaly Polymicrogyria-Polydactyly Hydrocephalus Syndrome	0.000720931	0.0278507
Congenital arteriovenous malformation	0.00326817	0.0485851
Polyp of large intestine	0.00326817	0.0485851
Dysgerminoma	0.00246894	0.0445075
Malformations of Cortical Development	0.000271049	0.0222093
Liver carcinoma	0.00149146	0.0405457
NEVUS, EPIDERMAL (disorder)	0.00119286	0.0350224
Hypertrophic Cardiomyopathy	0.000626469	0.0278507
Squamous cell carcinoma of esophagus	0.00188983	0.0418198
Malignant melanoma of iris	0.000720931	0.0278507
#breast glandular cells
Disease Name	p-value	corr p-value
Ovarian Cysts	0.00102743	0.0145102
Hamartomatous polyp	0.0022578	0.0223872
Dysgerminoma	3.33693e-07	0.000189538
Cortical Dysplasia	0.00505611	0.0425462
Micronodular cirrhosis	0.00397081	0.0369741
Malformations of Cortical Development	0.000249949	0.00721884
Fibrous Dysplasia, Monostotic	0.000783094	0.0121862
Lymphangioma	0.000783094	0.0121862
Polyp of large intestine	0.00109848	0.0145102
BREAST-OVARIAN CANCER, FAMILIAL, SUSCEPTIBILITY TO, 1	0.00505611	0.0425462
Thyroid Gland Follicular Adenoma	0.00161372	0.0190957
Benign neoplasm of eye, unspecified	0.00230572	0.0223872
Multiple, subcutaneous nodules	0.000132536	0.00532455
Abnormality of the urinary system	0.000234189	0.00719023
Bicuspid aortic valve	0.00084115	0.0127406
Hereditary Diffuse Gastric Cancer	0.00230572	0.0223872
Pseudohypoparathyroidism, Type Ia	0.000783094	0.0121862
SPINOCEREBELLAR ATAXIA 17	6.80051e-05	0.00351154
Anemia, Macrocytic	0.00135317	0.0167088
Albright's hereditary osteodystrophy	0.000783094	0.0121862
Low set ears	0.00170208	0.0199337
Acute Coronary Syndrome	2.86058e-05	0.00203101
Congenital bronchogenic cyst	0.00230572	0.0223872
Congenital arteriovenous malformation	3.86303e-05	0.0025037
Pseudopseudohypoparathyroidism	0.000783094	0.0121862
Micrognathism	0.000266894	0.00721884
Upper limb asymmetry	0.00230572	0.0223872
liposarcoma	0.00452613	0.039858
Subcutaneous lipomas	0.00161372	0.0190957
Melanocytic nevus	0.00116648	0.0152313
Mandibular hypoplasia	0.000266894	0.00721884
melanoma	0.000114922	0.00483522
Brain Ischemia	0.00105702	0.0145102
Osteoporosis	0.00072628	0.0121862
Acth-Independent Macronodular Adrenal Hyperplasia	0.00452613	0.039858
Pseudohypoaldosteronism	0.00505611	0.0425462
LONG QT SYNDROME 14	2.17806e-05	0.00164952
Phencyclidine Abuse	0.00109848	0.0145102
Conjunctival hamartoma	0.000701037	0.0121862
McCune-Albright Syndrome	0.000783094	0.0121862
CEROID LIPOFUSCINOSIS, NEURONAL, 6	0.000409057	0.00988699
Malignant melanoma of ciliary body	2.17806e-05	0.00164952
Retinal Detachment	0.00207626	0.0223872
Marijuana Abuse	0.000317633	0.00839143
Phakomatosis cesioflammea	0.000783094	0.0121862
Schizophrenia	1.98269e-05	0.00164952
Trigeminal Neuralgia	0.000249949	0.00721884
Gastrointestinal hamartomatous polyps	0.0022578	0.0223872
VENTRICULAR TACHYCARDIA, CATECHOLAMINERGIC POLYMORPHIC, 4	2.17806e-05	0.00164952
Mental Depression	0.00108992	0.0145102
Pancreatic Neoplasm	0.000765907	0.0121862
Thyroiditis	8.53123e-05	0.00403812
Uterine Cervical Neoplasm	0.00554567	0.0463227
Hypoplastic mandible condyle	0.000266894	0.00721884
Intestinal Polyposis	0.000701037	0.0121862
Acquired cubitus valgus	0.00135317	0.0167088
Bipolar Disorder	0.000581937	0.0121862
Hyperparathyroidism	0.00505611	0.0425462
Endogenous depression	0.000409057	0.00988699
Uranostaphyloschisis	0.000813265	0.0124847
Thyrotoxicosis due to pituitary thyroid hormone resistance	0.000783094	0.0121862
Liposarcoma, well differentiated	0.00230572	0.0223872
LEOPARD Syndrome	0.000208856	0.00659056
Syndactyly	0.00102743	0.0145102
Osteoma cutis	0.000783094	0.0121862
Parkinson Disease	6.61664e-05	0.00351154
Mucosal telangiectasiae	0.00048355	0.0112105
Hip Dysplasia	0.00230572	0.0223872
Pseudohypoparathyroidism Type 1C	0.000783094	0.0121862
NEVUS, EPIDERMAL (disorder)	0.000208856	0.00659056
Severe depression	0.00109848	0.0145102
Substance Withdrawal Syndrome	0.00382556	0.0362153
Liver carcinoma	5.25098e-05	0.00313953
Dermoid choristoma of eye proper	0.00230572	0.0223872
Hyperkyphosis	0.00491057	0.0425462
Depressive disorder	0.000103207	0.00468973
Strawberry nevus of skin	0.000110851	0.00483522
Hypothyroidism	0.00258296	0.0248664
Malignant melanoma of iris	6.03319e-07	0.000228457
Malignant melanoma of choroid	2.17806e-05	0.00164952
Hamartoma Syndrome, Multiple	0.0022578	0.0223872
Short fifth metatarsal	0.00230572	0.0223872
Squamous cell carcinoma of the head and neck	0.000154036	0.00564468
Anemia, Diamond-Blackfan	0.00135317	0.0167088
Myocardial Ischemia	0.000327459	0.00845439
Fibrosis Of Extraocular Muscles, Congenital, 1	0.00452613	0.039858
Proteus Syndrome	0.000783094	0.0121862
Uveal melanoma	3.736e-06	0.000707349
Congenital macrodactylia	8.53123e-05	0.00403812
Frontal bossing	0.00150261	0.0183544
Polyostotic fibrous dysplasia	0.000783094	0.0121862
Megalanecephaly Polymicrogyria-Polydactyly Hydrocephalus Syndrome	0.00452613	0.039858
Anomalous pulmonary artery	0.00452613	0.039858
Reperfusion Injury	0.000135926	0.00532455
INCLUSION BODY MYOPATHY WITH EARLY-ONSET PAGET DISEASE AND FRONTOTEMPORAL DEMENTIA	2.17806e-05	0.00164952
Syndactyly of fingers	0.00208969	0.0223872
Hemangioma, Cavernous	0.00205018	0.0223872
Port-Wine Stain	0.00109848	0.0145102
LONG QT SYNDROME 15	2.17806e-05	0.00164952
T-Cell Lymphoma	0.00505611	0.0425462
Pseudohypoparathyroidism	0.000208856	0.00659056
Varicocele	2.17806e-05	0.00164952
Adult T-Cell Lymphoma/Leukemia	0.00155569	0.0188007
Leukemia, T-Cell	0.000208856	0.00659056
Prominent epicanthal folds	0.00230572	0.0223872
Heart failure	0.00279373	0.0266696
Ovarian papillary adenocarcinoma	2.95002e-06	0.000670245
Abnormality of the penis	0.000701037	0.0121862
Hypocalcemic tetany	0.000783094	0.0121862
Angioid Streaks	0.000701037	0.0121862
Ki-1+ Anaplastic Large Cell Lymphoma	0.00452613	0.039858
Malocclusion	0.000999137	0.0145102
Testicular Hydrocele	0.00109848	0.0145102
Pectus excavatum	0.000471741	0.0111645
Breast Carcinoma	6.56152e-05	0.00351154
ovarian neoplasm	0.000552806	0.0121862
Tachycardia, Ventricular	0.0041182	0.0380348
Thrombophlebitis	0.00230572	0.0223872
Hypoplasia of the maxilla	1.84457e-06	0.000523857
Cleft Palate	0.0001426	0.00539978
Pseudohypoparathyroidism Type 1B	0.00230572	0.0223872
Cafe au lait spots, multiple	0.00135317	0.0167088
Hyperthyroidism	3.96714e-05	0.0025037
Cardiac Arrest	0.00397081	0.0369741
VENTRICULAR TACHYCARDIA, CATECHOLAMINERGIC POLYMORPHIC, 1 (disorder)	0.000701037	0.0121862
Squamous cell carcinoma	9.98913e-11	1.13477e-07
Osteoma	0.000783094	0.0121862
Hyperphosphatemia (disorder)	0.00135317	0.0167088
Vascular ring	0.00230572	0.0223872
Visceral angiomatosis	0.000353125	0.00891445
Angle class 2 malocclusion	0.000999137	0.0145102
Liposarcoma, Dedifferentiated	0.00230572	0.0223872
Fibroadenoma of breast	2.17806e-05	0.00164952
Constrictive median neuropathy	0.00230572	0.0223872
Mandibulofacial Dysostosis	0.000208856	0.00659056
Diverticular disease of colon	0.00064496	0.0121862
#breast myoepithelial cells
Disease Name	p-value	corr p-value
Microstomia	0.000389762	0.00799006
Cleft Palate	4.89866e-05	0.00212701
Hyperthyroidism	1.49105e-05	0.00117154
Pseudohypoparathyroidism Type 1B	0.00154171	0.0151418
Cafe au lait spots, multiple	0.000634332	0.008209
Cardiac Arrest	0.00223354	0.0209991
VENTRICULAR TACHYCARDIA, CATECHOLAMINERGIC POLYMORPHIC, 1 (disorder)	0.000386768	0.00799006
Squamous cell carcinoma	2.3777e-12	2.61547e-09
Osteoma	0.00052179	0.00799006
Hyperphosphatemia (disorder)	0.000634332	0.008209
Transitional cell carcinoma of bladder	0.00634558	0.0474839
Visceral angiomatosis	0.00285495	0.0257413
Angle class 2 malocclusion	0.000297486	0.00729991
Vascular ring	0.00154171	0.0151418
Liposarcoma, Dedifferentiated	0.00154171	0.0151418
Fibroadenoma of breast	1.18298e-05	0.00100098
Primary hypercorticolism	0.00498528	0.0388922
Byzanthine arch palate	0.000522985	0.00799006
Diverticular disease of colon	0.000298633	0.00729991
Constrictive median neuropathy	0.00154171	0.0151418
Dilatation of ureter	0.00439129	0.0357809
Fused cervical vertebrae	0.00498528	0.0388922
Varicocele	1.18298e-05	0.00100098
Adult T-Cell Lymphoma/Leukemia	0.000626198	0.008209
T-Cell Lymphoma	0.00285495	0.0257413
Pseudohypoparathyroidism	0.000114331	0.00349344
Prominent epicanthal folds	0.00154171	0.0151418
Leukemia, T-Cell	0.000114331	0.00349344
Short distal phalanx of hallux	0.00052179	0.00799006
Heart failure	0.00538789	0.0417372
Ovarian papillary adenocarcinoma	0.000114331	0.00349344
Abnormality of the penis	0.000386768	0.00799006
Hypocalcemic tetany	0.00052179	0.00799006
Angioid Streaks	0.000386768	0.00799006
Testicular Hydrocele	0.000608403	0.008209
Pectus excavatum	3.96577e-07	0.000145412
Breast Carcinoma	0.000266027	0.00696739
Malocclusion	0.000297486	0.00729991
Thrombophlebitis	0.00154171	0.0151418
Hypoplasia of the maxilla	1.7264e-05	0.00119451
Tachycardia, Ventricular	0.00197833	0.0190891
Frontometaphyseal dysplasia	0.00052179	0.00799006
Exophthalmos	0.00671252	0.0492251
Macroglossia	0.00418039	0.0351025
Myocardial Ischemia	0.00608677	0.0461755
Proteus Syndrome	0.00052179	0.00799006
Severe sensorineural hearing impairment	0.00498528	0.0388922
Uveal melanoma	1.37402e-06	0.000377857
Congenital macrodactylia	4.65185e-05	0.00212701
Frontal bossing	0.000247915	0.00665137
Polyostotic fibrous dysplasia	0.00052179	0.00799006
Meningioma	0.00167834	0.0163378
Megalanecephaly Polymicrogyria-Polydactyly Hydrocephalus Syndrome	0.0030369	0.0265126
Anomalous pulmonary artery	0.0030369	0.0265126
Reperfusion Injury	0.000144587	0.00418542
INCLUSION BODY MYOPATHY WITH EARLY-ONSET PAGET DISEASE AND FRONTOTEMPORAL DEMENTIA	1.18298e-05	0.00100098
Syndactyly of fingers	9.85774e-05	0.00349344
Hemangioma, Cavernous	0.000968971	0.0116876
Port-Wine Stain	0.000608403	0.008209
LONG QT SYNDROME 15	1.18298e-05	0.00100098
NEVUS, EPIDERMAL (disorder)	0.000114331	0.00349344
Severe depression	0.000608403	0.008209
Liver carcinoma	4.18774e-05	0.00212701
Dermoid choristoma of eye proper	0.00154171	0.0151418
Hyperkyphosis	0.001251	0.0142913
ACTH-Secreting Pituitary Adenoma	0.00498528	0.0388922
Depressive disorder	7.68898e-05	0.00313255
Strawberry nevus of skin	5.02749e-05	0.00212701
Hypothyroidism	0.000917471	0.0113395
Malignant melanoma of iris	2.66847e-07	0.000145412
Malignant melanoma of choroid	1.18298e-05	0.00100098
Hamartoma Syndrome, Multiple	0.00126024	0.0142913
Short fifth metatarsal	0.00154171	0.0151418
Squamous cell carcinoma of the head and neck	5.01398e-05	0.00212701
Anemia, Diamond-Blackfan	0.000634332	0.008209
Anxiety disease	0.00649758	0.0479687
Mental Depression	0.000977509	0.0116876
Romano-Ward Syndrome	0.00439129	0.0357809
Thyroiditis	4.65185e-05	0.00212701
Pancreatic Neoplasm	0.00393867	0.0333272
Bipolar Disorder	4.55075e-05	0.00212701
Hypoplastic mandible condyle	0.000579828	0.008209
Intestinal Polyposis	0.000386768	0.00799006
Degenerative polyarthritis	0.00559743	0.0430572
Endogenous depression	0.000224801	0.00634055
Uranostaphyloschisis	0.000437508	0.00799006
Endometrial Hyperplasia	0.00498528	0.0388922
Syndactyly	0.000352499	0.00799006
LEOPARD Syndrome	0.000114331	0.00349344
Thyrotoxicosis due to pituitary thyroid hormone resistance	0.00052179	0.00799006
Liposarcoma, well differentiated	0.00154171	0.0151418
Osteoma cutis	0.00052179	0.00799006
Parkinson Disease	0.00332306	0.0285575
Mucosal telangiectasiae	0.00357276	0.0304654
Hip Dysplasia	0.00154171	0.0151418
Pseudohypoparathyroidism Type 1C	0.00052179	0.00799006
Congenital clinodactyly	0.00239271	0.0223049
Irregular metacarpals	0.00052179	0.00799006
Anxiety	0.00649758	0.0479687
Mandibular hypoplasia	0.000579828	0.008209
melanoma	0.000124365	0.00369734
Aortic valve calcification	0.00498528	0.0388922
Acth-Independent Macronodular Adrenal Hyperplasia	0.0030369	0.0265126
Brain Ischemia	0.00117833	0.0139372
Osteoporosis	0.00139968	0.0151418
Pseudohypoaldosteronism	0.00285495	0.0257413
LONG QT SYNDROME 14	1.18298e-05	0.00100098
McCune-Albright Syndrome	0.00052179	0.00799006
Phencyclidine Abuse	0.000608403	0.008209
Conjunctival hamartoma	0.000386768	0.00799006
Malignant melanoma of ciliary body	1.18298e-05	0.00100098
Retinal Detachment	0.00084284	0.0107805
Marijuana Abuse	0.000970015	0.0116876
Schizophrenia	3.47886e-05	0.00201407
Trigeminal Neuralgia	0.000114306	0.00349344
Phakomatosis cesioflammea	0.00052179	0.00799006
Gastrointestinal hamartomatous polyps	0.00126024	0.0142913
VENTRICULAR TACHYCARDIA, CATECHOLAMINERGIC POLYMORPHIC, 4	1.18298e-05	0.00100098
Fissured tongue	0.00634558	0.0474839
Hereditary Diffuse Gastric Cancer	0.00154171	0.0151418
Acquired scoliosis	0.00595496	0.0454893
SPINOCEREBELLAR ATAXIA 17	3.07145e-05	0.001877
Pseudohypoparathyroidism, Type Ia	0.00052179	0.00799006
Sezary Syndrome	0.00309706	0.026825
Anemia, Macrocytic	0.000634332	0.008209
Albright's hereditary osteodystrophy	0.00052179	0.00799006
Agyria	0.00439129	0.0357809
Low set ears	0.00291082	0.0260317
Acute Coronary Syndrome	8.83259e-05	0.00342621
Congenital bronchogenic cyst	0.00154171	0.0151418
Congenital arteriovenous malformation	1.73747e-05	0.00119451
Lissencephaly	0.00439129	0.0357809
Pseudopseudohypoparathyroidism	0.00052179	0.00799006
Micrognathism	0.000579828	0.008209
Upper limb asymmetry	0.00154171	0.0151418
Melanocytic nevus	0.000401954	0.00799006
Subcutaneous lipomas	0.000897248	0.0112156
Hamartomatous polyp	0.00126024	0.0142913
Ovarian Cysts	0.00255778	0.0236434
Dysgerminoma	8.84588e-06	0.00100098
Micronodular cirrhosis	0.00223354	0.0209991
Malformations of Cortical Development	0.00223354	0.0209991
Fibrous Dysplasia, Monostotic	0.00052179	0.00799006
Polyp of large intestine	0.000608403	0.008209
Lymphangioma	0.00052179	0.00799006
Thyroid Gland Follicular Adenoma	0.000897248	0.0112156
Benign neoplasm of eye, unspecified	0.00154171	0.0151418
Multiple, subcutaneous nodules	0.000237318	0.00652625
Bicuspid aortic valve	2.12863e-05	0.00137735
Abnormality of the urinary system	9.03273e-05	0.00342621
#bronchus respiratory epithelial cells
Disease Name	p-value	corr p-value
CEROID LIPOFUSCINOSIS, NEURONAL, 6	0.000429481	0.011795
McCune-Albright Syndrome	0.00080947	0.014942
Phencyclidine Abuse	0.00115251	0.0190842
Conjunctival hamartoma	0.000735778	0.014942
Gastrointestinal hamartomatous polyps	0.00236719	0.0263023
VENTRICULAR TACHYCARDIA, CATECHOLAMINERGIC POLYMORPHIC, 4	2.28926e-05	0.00184122
Marijuana Abuse	0.000347156	0.0102868
Schizophrenia	6.43113e-07	0.000181518
Trigeminal Neuralgia	0.000266333	0.00833032
Mandibular hypoplasia	0.00228127	0.0263023
melanoma	0.00127563	0.0205195
Acth-Independent Macronodular Adrenal Hyperplasia	0.00467561	0.0457804
Brain Ischemia	0.00118727	0.0193748
Osteoporosis	0.00025241	0.00833032
Pseudohypoaldosteronism	0.0052955	0.0492788
LONG QT SYNDROME 14	2.28926e-05	0.00184122
Syndactyly	0.000161439	0.00699157
Thyrotoxicosis due to pituitary thyroid hormone resistance	0.00080947	0.014942
Liposarcoma, well differentiated	0.00238263	0.0263023
Endogenous depression	0.000429481	0.011795
Parkinson Disease	7.519e-05	0.00403161
Mucosal telangiectasiae	0.000514858	0.0138031
Hip Dysplasia	0.00238263	0.0263023
Pseudohypoparathyroidism Type 1C	0.00080947	0.014942
Acute kidney injury	0.00461584	0.0457804
Osteoma cutis	0.00080947	0.014942
Mental Depression	1.74201e-05	0.00184122
Thyroiditis	6.44824e-07	0.000181518
Pancreatic Neoplasm	0.000861706	0.0156497
Single major depressive episode	0.00169249	0.0247499
Hyperparathyroidism	0.0052955	0.0492788
Intestinal Polyposis	0.000735778	0.014942
Hypoplastic mandible condyle	0.00228127	0.0263023
Bipolar Disorder	0.000341822	0.0102868
Multiple, subcutaneous nodules	0.000148604	0.00669312
Abnormality of the urinary system	0.000252939	0.00833032
Hamartomatous polyp	0.00236719	0.0263023
Ovarian Cysts	0.00111936	0.0190842
Dysgerminoma	3.62405e-07	0.000181518
Cortical Dysplasia	0.0052955	0.0492788
Micronodular cirrhosis	0.00416026	0.0433745
Malformations of Cortical Development	0.000266333	0.00833032
BREAST-OVARIAN CANCER, FAMILIAL, SUSCEPTIBILITY TO, 1	0.0052955	0.0492788
Thyroid Gland Follicular Adenoma	0.00169249	0.0247499
Benign neoplasm of eye, unspecified	0.00238263	0.0263023
Fibrous Dysplasia, Monostotic	0.00080947	0.014942
Polyp of large intestine	0.00115251	0.0190842
Lymphangioma	0.00080947	0.014942
Congenital arteriovenous malformation	0.00115251	0.0190842
Congenital bronchogenic cyst	0.00238263	0.0263023
Upper limb asymmetry	0.00238263	0.0263023
Subcutaneous lipomas	0.00169249	0.0247499
Pseudopseudohypoparathyroidism	0.00080947	0.014942
Micrognathism	0.00228127	0.0263023
SPINOCEREBELLAR ATAXIA 17	7.25451e-05	0.00403161
Pseudohypoparathyroidism, Type Ia	0.00080947	0.014942
Anemia, Macrocytic	0.00143863	0.0221904
Hereditary Diffuse Gastric Cancer	0.00238263	0.0263023
Acute Coronary Syndrome	3.18161e-05	0.00223906
Albright's hereditary osteodystrophy	0.00080947	0.014942
Ki-1+ Anaplastic Large Cell Lymphoma	0.00467561	0.0457804
Hypocalcemic tetany	0.00080947	0.014942
Angioid Streaks	0.000735778	0.014942
Thrombophlebitis	0.00238263	0.0263023
Hypoplasia of the maxilla	1.52859e-05	0.00184122
ovarian neoplasm	0.00244768	0.0265008
Tachycardia, Ventricular	0.00436858	0.0451286
Testicular Hydrocele	0.00115251	0.0190842
Pectus excavatum	0.00213522	0.0263023
Breast Carcinoma	7.1944e-05	0.00403161
Malocclusion	0.00543059	0.0497142
Varicocele	2.28926e-05	0.00184122
T-Cell Lymphoma	0.0052955	0.0492788
Pseudohypoparathyroidism	0.000219362	0.0077188
Leukemia, T-Cell	0.000219362	0.0077188
Ovarian papillary adenocarcinoma	3.15176e-06	0.000709776
Abnormality of the penis	0.000735778	0.014942
Status Epilepticus	0.00242783	0.0265008
Liposarcoma, Dedifferentiated	0.00238263	0.0263023
Fibroadenoma of breast	2.28926e-05	0.00184122
Leiomyosarcoma of uterus	0.0052955	0.0492788
Visceral angiomatosis	0.000376131	0.0108596
Angle class 2 malocclusion	0.00543059	0.0497142
Vascular ring	0.00238263	0.0263023
Diverticular disease of colon	0.000686462	0.014942
Constrictive median neuropathy	0.00238263	0.0263023
Mandibulofacial Dysostosis	0.000219362	0.0077188
Hyperthyroidism	4.29485e-05	0.00268667
Pseudohypoparathyroidism Type 1B	0.00238263	0.0263023
Cafe au lait spots, multiple	0.00143863	0.0221904
Cleft Palate	0.0016277	0.0247499
Transitional cell carcinoma of bladder	0.00114432	0.0190842
Cardiac Arrest	0.00416026	0.0433745
VENTRICULAR TACHYCARDIA, CATECHOLAMINERGIC POLYMORPHIC, 1 (disorder)	0.000735778	0.014942
Squamous cell carcinoma	9.82863e-10	1.1067e-06
Osteoma	0.00080947	0.014942
Hamartoma Syndrome, Multiple	0.00236719	0.0263023
Hypothyroidism	0.00280524	0.0300829
Malignant melanoma of iris	0.00467561	0.0457804
Squamous cell carcinoma of the head and neck	0.000168622	0.00703217
Anemia, Diamond-Blackfan	0.00143863	0.0221904
Short fifth metatarsal	0.00238263	0.0263023
Dermoid choristoma of eye proper	0.00238263	0.0263023
NEVUS, EPIDERMAL (disorder)	0.000219362	0.0077188
Severe depression	4.12248e-05	0.00268667
Liver carcinoma	0.000203067	0.0077188
Substance Withdrawal Syndrome	0.000130146	0.00610601
Depressive disorder	7.01613e-06	0.00131669
Strawberry nevus of skin	0.00236719	0.0263023
Megalanecephaly Polymicrogyria-Polydactyly Hydrocephalus Syndrome	0.00467561	0.0457804
Polyostotic fibrous dysplasia	0.00080947	0.014942
Meningioma	0.00372259	0.0395437
LONG QT SYNDROME 15	2.28926e-05	0.00184122
Reperfusion Injury	2.98674e-05	0.00223906
INCLUSION BODY MYOPATHY WITH EARLY-ONSET PAGET DISEASE AND FRONTOTEMPORAL DEMENTIA	2.28926e-05	0.00184122
Syndactyly of fingers	0.0022713	0.0263023
Hemangioma, Cavernous	0.00217804	0.0263023
Myocardial Ischemia	0.000111906	0.00547853
Fibrosis Of Extraocular Muscles, Congenital, 1	0.00467561	0.0457804
Proteus Syndrome	0.00080947	0.014942
Uveal melanoma	0.00236719	0.0263023
Congenital macrodactylia	8.96358e-05	0.00458772
Frontal bossing	0.00172865	0.0249546
#caudate glial cells
Disease Name	p-value	corr p-value
Depressive disorder	1.82535e-05	0.00163186
Strawberry nevus of skin	0.000502867	0.0140488
Anhedonia	7.28617e-05	0.00465274
Dysgerminoma	0.000152184	0.00716064
Substance Withdrawal Syndrome	0.000261428	0.00934867
NEVUS, EPIDERMAL (disorder)	0.00268199	0.0452395
Severe depression	0.000240514	0.00895916
Agoraphobia	0.00162702	0.0328895
Anemia, Diamond-Blackfan	0.000190544	0.00811173
Abnormality of the urinary system	0.000358436	0.0110497
Malignant melanoma of choroid	4.56801e-06	0.000680633
Malignant melanoma of iris	1.80478e-05	0.00163186
Acute Coronary Syndrome	1.49543e-05	0.00163186
Uveal melanoma	0.000502867	0.0140488
Congenital macrodactylia	0.00162702	0.0328895
Anemia, Macrocytic	0.000190544	0.00811173
SPINOCEREBELLAR ATAXIA 17	0.000356361	0.0110497
Myocardial Ischemia	0.00230888	0.0437197
Syndactyly of fingers	0.00116636	0.0267367
INCLUSION BODY MYOPATHY WITH EARLY-ONSET PAGET DISEASE AND FRONTOTEMPORAL DEMENTIA	4.56801e-06	0.000680633
Port-Wine Stain	0.000240514	0.00895916
Micrognathism	0.000694007	0.0177269
Congenital Epicanthus	0.00291094	0.0481922
Congenital arteriovenous malformation	0.000240514	0.00895916
Intermittent migraine headaches	0.000333328	0.0110369
Ovarian papillary adenocarcinoma	0.00268199	0.0452395
Leukemia, T-Cell	0.00268199	0.0452395
Aortic valve calcification	0.00268199	0.0452395
Mandibular hypoplasia	0.000694007	0.0177269
Varicocele	0.000822533	0.0193512
Adult T-Cell Lymphoma/Leukemia	0.00165551	0.0328895
Hypoplasia of the maxilla	1.17384e-07	4.31979e-05
Malocclusion	4.12698e-05	0.00283809
Phakomatosis cesioflammea	0.000277223	0.0095322
Schizophrenia	3.32269e-05	0.00270044
Pectus excavatum	0.00137644	0.0307635
Marijuana Abuse	0.00234737	0.0437197
CEROID LIPOFUSCINOSIS, NEURONAL, 6	8.80401e-05	0.00491924
Malignant melanoma of ciliary body	4.56801e-06	0.000680633
Cocaine Dependence	0.000780365	0.0193512
Bipolar Disorder	0.000126582	0.00628692
Hypoplastic mandible condyle	0.000694007	0.0177269
Squamous cell carcinoma	1.02543e-08	9.16738e-06
Thyroiditis	0.00162702	0.0328895
Mental Depression	7.05059e-06	0.000900461
Cleft Palate	0.000118284	0.00622036
Single major depressive episode	1.44959e-07	4.31979e-05
Mandibulofacial Dysostosis	0.00268199	0.0452395
Mucosal telangiectasiae	0.00145231	0.0316674
Diverticular disease of colon	0.00179329	0.0348522
Parkinson Disease	8.79734e-05	0.00491924
Fibroadenoma of breast	0.000822533	0.0193512
Uranostaphyloschisis	0.000468501	0.0139613
Angle class 2 malocclusion	4.12698e-05	0.00283809
#caudate neuronal cells
Disease Name	p-value	corr p-value
Subcutaneous lipomas	0.0010224	0.0128888
Upper limb asymmetry	0.00168572	0.017481
Micrognathism	0.00255471	0.0239027
Pseudopseudohypoparathyroidism	0.000570938	0.00883675
Congenital arteriovenous malformation	2.07498e-05	0.00153697
Congenital bronchogenic cyst	0.00168572	0.017481
Low set ears	0.00410227	0.0348693
Albright's hereditary osteodystrophy	0.000570938	0.00883675
Sezary Syndrome	0.00364011	0.0314566
Anemia, Macrocytic	0.000751168	0.0102495
Pseudohypoparathyroidism, Type Ia	0.000570938	0.00883675
Polymicrogyria	0.00557027	0.0444336
SPINOCEREBELLAR ATAXIA 17	0.0010224	0.0128888
Abnormality of the urinary system	0.00138877	0.0167188
Bicuspid aortic valve	0.00602247	0.0473129
Multiple, subcutaneous nodules	0.000312321	0.00830453
Benign neoplasm of eye, unspecified	0.00168572	0.017481
BREAST-OVARIAN CANCER, FAMILIAL, SUSCEPTIBILITY TO, 1	0.00324292	0.0287428
Thyroid Gland Follicular Adenoma	0.0010224	0.0128888
Lymphangioma	0.000570938	0.00883675
Polyp of large intestine	0.000693815	0.00985598
Fibrous Dysplasia, Monostotic	0.000570938	0.00883675
Dysgerminoma	0.000441416	0.00880285
Micronodular cirrhosis	0.00253905	0.0239027
Malformations of Cortical Development	0.00253905	0.0239027
Ovarian Cysts	0.00310646	0.0287428
Hamartomatous polyp	0.00143488	0.0167188
Mucosal telangiectasiae	0.00405509	0.0347532
Hip Dysplasia	0.00168572	0.017481
Pseudohypoparathyroidism Type 1C	0.000570938	0.00883675
Parkinson Disease	0.000132213	0.00415471
Osteoma cutis	0.000570938	0.00883675
Acute kidney injury	0.000334014	0.00844812
Thyrotoxicosis due to pituitary thyroid hormone resistance	0.000570938	0.00883675
Syndactyly	5.40274e-05	0.00248626
Uranostaphyloschisis	0.00220227	0.0223898
Endometrial Hyperplasia	0.00544325	0.043757
Endogenous depression	0.000256769	0.00700709
Hyperparathyroidism	0.00324292	0.0287428
Uterine Cervical Neoplasm	0.00315925	0.0287428
Hypoplastic mandible condyle	0.00255471	0.0239027
Intestinal Polyposis	0.000441416	0.00880285
Bipolar Disorder	5.76374e-07	0.000210621
Pancreatic Neoplasm	0.00503204	0.0420825
Streptococcal pneumonia	0.000256769	0.00700709
Thyroiditis	5.32187e-05	0.00248626
Romano-Ward Syndrome	0.00498024	0.0419878
Mental Depression	5.41582e-05	0.00248626
Single major depressive episode	0.0010224	0.0128888
VENTRICULAR TACHYCARDIA, CATECHOLAMINERGIC POLYMORPHIC, 4	1.35445e-05	0.00117047
Gastrointestinal hamartomatous polyps	0.00143488	0.0167188
Phakomatosis cesioflammea	0.000570938	0.00883675
Schizophrenia	8.12424e-07	0.000210621
Trigeminal Neuralgia	0.00253905	0.0239027
Retinal Detachment	0.0010316	0.0128888
Marijuana Abuse	0.00118623	0.0144721
CEROID LIPOFUSCINOSIS, NEURONAL, 6	0.000256769	0.00700709
Malignant melanoma of ciliary body	1.35445e-05	0.00117047
Unipolar Depression	0.000416576	0.00880285
Phencyclidine Abuse	0.000693815	0.00985598
Conjunctival hamartoma	0.000441416	0.00880285
McCune-Albright Syndrome	0.000570938	0.00883675
LONG QT SYNDROME 14	1.35445e-05	0.00117047
Pseudohypoaldosteronism	0.00324292	0.0287428
Brain Ischemia	0.00157013	0.017481
Aortic valve calcification	0.00544325	0.043757
Acth-Independent Macronodular Adrenal Hyperplasia	0.00331823	0.028916
Mandibular hypoplasia	0.00255471	0.0239027
melanoma	5.83554e-05	0.00248626
LONG QT SYNDROME 15	1.35445e-05	0.00117047
INCLUSION BODY MYOPATHY WITH EARLY-ONSET PAGET DISEASE AND FRONTOTEMPORAL DEMENTIA	1.35445e-05	0.00117047
Syndactyly of fingers	0.000130564	0.00415471
Hemangioma, Cavernous	8.67996e-05	0.00333375
Port-Wine Stain	0.000693815	0.00985598
Megalanecephaly Polymicrogyria-Polydactyly Hydrocephalus Syndrome	0.00331823	0.028916
Polyostotic fibrous dysplasia	0.000570938	0.00883675
Meningioma	0.00197918	0.0203209
Frontal bossing	0.000374447	0.00880285
Uveal melanoma	5.99387e-05	0.00248626
Congenital macrodactylia	5.32187e-05	0.00248626
Major Depressive Disorder	0.000537777	0.00883675
Proteus Syndrome	0.000570938	0.00883675
Myocardial Ischemia	0.000239152	0.00700709
Squamous cell carcinoma of the head and neck	6.44398e-05	0.00257016
Anemia, Diamond-Blackfan	0.000751168	0.0102495
Short fifth metatarsal	0.00168572	0.017481
Hamartoma Syndrome, Multiple	0.00143488	0.0167188
Malignant melanoma of choroid	1.35445e-05	0.00117047
Malignant melanoma of iris	5.32187e-05	0.00248626
Hypothyroidism	0.00115823	0.0142987
Depressive disorder	6.35263e-07	0.000210621
Strawberry nevus of skin	5.99387e-05	0.00248626
ACTH-Secreting Pituitary Adenoma	0.00544325	0.043757
Hyperkyphosis	0.00625908	0.048802
Dermoid choristoma of eye proper	0.00168572	0.017481
Substance Withdrawal Syndrome	3.81503e-05	0.00247261
Liver carcinoma	0.00574729	0.0454957
NEVUS, EPIDERMAL (disorder)	0.000130694	0.00415471
Severe depression	0.000693815	0.00985598
Constrictive median neuropathy	0.00168572	0.017481
Mandibulofacial Dysostosis	0.00544325	0.043757
Diverticular disease of colon	0.000354531	0.00875355
Primary hypercorticolism	0.00544325	0.043757
Fibroadenoma of breast	1.35445e-05	0.00117047
Vascular ring	0.00168572	0.017481
Visceral angiomatosis	0.00019284	0.00588161
Angle class 2 malocclusion	0.000390792	0.00880285
Osteoma	0.000570938	0.00883675
Hyperphosphatemia (disorder)	0.000751168	0.0102495
Cardiac Arrest	0.00253905	0.0239027
VENTRICULAR TACHYCARDIA, CATECHOLAMINERGIC POLYMORPHIC, 1 (disorder)	0.000441416	0.00880285
Squamous cell carcinoma	1.51583e-07	0.000157192
Pseudohypoparathyroidism Type 1B	0.00168572	0.017481
Cafe au lait spots, multiple	4.98805e-05	0.00248626
Hyperthyroidism	1.85398e-05	0.00147891
Cleft Palate	0.000964112	0.0128177
Microstomia	0.00255854	0.0239027
Tachycardia, Ventricular	0.002331	0.0234684
Thrombophlebitis	0.00168572	0.017481
Hypoplasia of the maxilla	2.46906e-05	0.00170694
Malocclusion	0.000390792	0.00880285
Testicular Hydrocele	0.000693815	0.00985598
Pectus excavatum	0.000629146	0.00959448
Breast Carcinoma	0.000327596	0.00844812
Angioid Streaks	0.000441416	0.00880285
Hypocalcemic tetany	0.000570938	0.00883675
Abnormality of the penis	0.000441416	0.00880285
Ovarian papillary adenocarcinoma	0.000130694	0.00415471
Leukemia, T-Cell	0.000130694	0.00415471
T-Cell Lymphoma	0.00324292	0.0287428
Pseudohypoparathyroidism	0.000130694	0.00415471
Varicocele	1.35445e-05	0.00117047
Adult T-Cell Lymphoma/Leukemia	0.000767773	0.01034
#caudate neuronal projections
Disease Name	p-value	corr p-value
#caudate synapses
Disease Name	p-value	corr p-value
#cerebellum cells in granular layer
Disease Name	p-value	corr p-value
Anemia, Macrocytic	0.00463977	0.0419382
SPINOCEREBELLAR ATAXIA 17	0.000542614	0.0123213
Neurofibrosarcoma	0.00355555	0.0359806
Proteus Syndrome	0.00036943	0.0095374
Fissured tongue	0.00392147	0.0381585
Myocardial Ischemia	0.000116002	0.00490897
Acute Coronary Syndrome	3.37152e-05	0.00174383
Sebaceous adenoma	0.00463977	0.0419382
Frontal bossing	0.000885992	0.0161737
Low set ears	0.00257664	0.0319847
Congenital macrodactylia	2.7749e-05	0.00161464
Congenital arteriovenous malformation	0.000366931	0.0095374
Megalanecephaly Polymicrogyria-Polydactyly Hydrocephalus Syndrome	0.00216068	0.0292169
Congenital bronchogenic cyst	0.00109422	0.0175641
LONG QT SYNDROME 15	7.03718e-06	0.000655161
Subcutaneous lipomas	0.000542614	0.0123213
Upper limb asymmetry	0.00109422	0.0175641
Hemangioma, Cavernous	3.07334e-05	0.00168311
Micrognathism	0.00256677	0.0319847
INCLUSION BODY MYOPATHY WITH EARLY-ONSET PAGET DISEASE AND FRONTOTEMPORAL DEMENTIA	7.03718e-06	0.000655161
Syndactyly of fingers	0.00219676	0.0292169
Costello syndrome (disorder)	0.0052659	0.0449776
Dermoid choristoma of eye proper	0.00109422	0.0175641
Liver carcinoma	0.000847094	0.0157729
Micronodular cirrhosis	0.00136181	0.0204491
Malformations of Cortical Development	0.00136181	0.0204491
Substance Withdrawal Syndrome	0.000562922	0.0124781
Dysgerminoma	0.000232623	0.00721908
Hamartomatous polyp	0.000764213	0.01452
Severe depression	8.77828e-06	0.000742962
NEVUS, EPIDERMAL (disorder)	6.83882e-05	0.00303188
Benign neoplasm of eye, unspecified	0.00109422	0.0175641
Thyroid Gland Follicular Adenoma	0.000542614	0.0123213
Polyp of large intestine	0.000366931	0.0095374
Lymphangioma	0.00036943	0.0095374
Strawberry nevus of skin	0.000764213	0.01452
Depressive disorder	4.8026e-05	0.00223561
Hamartoma Syndrome, Multiple	0.000764213	0.01452
Malignant Peripheral Nerve Sheath Tumor	0.00216068	0.0292169
Anemia, Diamond-Blackfan	0.00463977	0.0419382
Squamous cell carcinoma of the head and neck	0.00246822	0.0319847
Fibrous skin tumor of tuberous sclerosis	0.00463977	0.0419382
Thyroiditis	2.7749e-05	0.00161464
Streptococcal pneumonia	0.000134837	0.00523057
Hyperthyroidism	0.0026992	0.032378
Mental Depression	1.11098e-05	0.000792125
Cafe au lait spots, multiple	0.00463977	0.0419382
Romano-Ward Syndrome	0.0026992	0.032378
Microstomia	0.000729471	0.01452
Cleft Palate	0.00044994	0.0110235
Psychoses, Substance-Induced	0.00392147	0.0381585
Transitional cell carcinoma of bladder	0.00392147	0.0381585
Acquired cubitus valgus	0.00463977	0.0419382
Bipolar Disorder	5.59912e-06	0.000655161
Hypoplastic mandible condyle	0.00256677	0.0319847
VENTRICULAR TACHYCARDIA, CATECHOLAMINERGIC POLYMORPHIC, 1 (disorder)	0.000232623	0.00721908
Cardiac Arrest	0.00136181	0.0204491
Amegakaryocytic thrombocytopenia	0.0052659	0.0449776
Squamous cell carcinoma	6.42802e-08	5.98449e-05
Atypical absence seizure	0.00355555	0.0359806
Fibroadenoma of breast	7.03718e-06	0.000655161
LEOPARD Syndrome	0.00355555	0.0359806
Endometrial Hyperplasia	0.00355555	0.0359806
Uranostaphyloschisis	0.00141878	0.0204753
Lymphedema	0.000742728	0.01452
Angle class 2 malocclusion	1.19116e-05	0.000792125
Visceral angiomatosis	0.00174541	0.0246208
Neurogenic Urinary Bladder	0.0052659	0.0449776
Vascular ring	0.00109422	0.0175641
Diverticular disease of colon	0.000153994	0.00573474
Congenital clinodactyly	0.00582395	0.0488477
Hip Dysplasia	0.00109422	0.0175641
Cardio-facio-cutaneous syndrome	0.0052659	0.0449776
Mucosal telangiectasiae	0.00219016	0.0292169
Mandibulofacial Dysostosis	0.00355555	0.0359806
Epileptic encephalopathy	0.00142954	0.0204753
Acute kidney injury	0.00274743	0.032378
Aortic valve calcification	0.00355555	0.0359806
Lennox-Gastaut syndrome	0.00355555	0.0359806
Alcoholic Intoxication, Chronic	0.00416068	0.039934
Brain Ischemia	0.000379037	0.0095374
Leukemia, T-Cell	0.00355555	0.0359806
Adult T-Cell Lymphoma/Leukemia	0.00279185	0.0324902
Varicocele	7.03718e-06	0.000655161
melanoma	0.00300996	0.0345959
Mandibular hypoplasia	0.00256677	0.0319847
Factor XII Deficiency	0.00355555	0.0359806
Palmoplantar Keratosis	0.00582395	0.0488477
Diffuse Large B-Cell Lymphoma	0.00393471	0.0381585
Epilepsy	0.00273733	0.032378
Abnormality of the penis	0.000232623	0.00721908
Ovarian papillary adenocarcinoma	0.00355555	0.0359806
LONG QT SYNDROME 14	7.03718e-06	0.000655161
Status Epilepticus	0.0052047	0.0449776
Brain Infarction	0.00355555	0.0359806
CEROID LIPOFUSCINOSIS, NEURONAL, 6	0.000134837	0.00523057
Conjunctival hamartoma	0.000232623	0.00721908
Angioid Streaks	0.000232623	0.00721908
Phencyclidine Abuse	0.000366931	0.0095374
VENTRICULAR TACHYCARDIA, CATECHOLAMINERGIC POLYMORPHIC, 4	7.03718e-06	0.000655161
Hypoplasia of the maxilla	4.26851e-06	0.000655161
Thrombophlebitis	0.00109422	0.0175641
Gastrointestinal hamartomatous polyps	0.000764213	0.01452
Trigeminal Neuralgia	0.00136181	0.0204491
Breast Carcinoma	0.00142954	0.0204753
Pectus excavatum	0.000665335	0.0144053
Testicular Hydrocele	0.000366931	0.0095374
Schizophrenia	7.20106e-07	0.000335209
Malocclusion	1.19116e-05	0.000792125
Marijuana Abuse	4.0292e-05	0.00197431
Inflammatory Myofibroblastic Tumor	0.0052659	0.0449776
#cerebellum cells in molecular layer
Disease Name	p-value	corr p-value
Varicocele	5.49281e-06	0.000525479
Adult T-Cell Lymphoma/Leukemia	0.000193539	0.00617175
T-Cell Lymphoma	0.00137807	0.0197753
Mandibular hypoplasia	0.00122718	0.0182172
melanoma	0.000447631	0.0094954
Aortic valve calcification	0.00302504	0.0342705
Leukemia, T-Cell	5.35032e-05	0.00260884
Osteoporosis	0.00263753	0.0329118
Ovarian papillary adenocarcinoma	0.00302504	0.0342705
Abnormality of the penis	0.000182411	0.00604062
Conjunctival hamartoma	0.000182411	0.00604062
Angioid Streaks	0.000182411	0.00604062
Malignant melanoma of ciliary body	5.49281e-06	0.000525479
CEROID LIPOFUSCINOSIS, NEURONAL, 6	0.000105611	0.00454656
Retinal Detachment	0.00262044	0.0329118
Inflammatory Myofibroblastic Tumor	0.00448475	0.0454279
Testicular Hydrocele	0.000288058	0.00770833
Pectus excavatum	0.00195531	0.025508
Schizophrenia	5.45402e-05	0.00260884
Breast Carcinoma	0.00105415	0.0168078
Trigeminal Neuralgia	4.23623e-05	0.00243159
Malocclusion	0.00329425	0.0354544
Phakomatosis cesioflammea	0.000313347	0.00770833
Thrombophlebitis	0.000929055	0.0150928
Hypoplasia of the maxilla	2.16414e-06	0.000465832
Gastrointestinal hamartomatous polyps	0.000601318	0.0117667
Cleft Palate	0.000808489	0.0150928
Mental Depression	0.000760045	0.0145422
Hyperthyroidism	0.00213596	0.0274487
Thyroiditis	2.16843e-05	0.00133358
Pancreatic Neoplasm	0.00092533	0.0150928
Streptococcal pneumonia	0.000105611	0.00454656
Squamous cell carcinoma	2.62512e-09	2.26023e-06
Hypoplastic mandible condyle	0.00122718	0.0182172
Transitional cell carcinoma of bladder	0.00311019	0.0343317
Visceral angiomatosis	0.00137807	0.0197753
Angle class 2 malocclusion	0.00329425	0.0354544
Uranostaphyloschisis	0.00286069	0.0342705
Endometrial Hyperplasia	0.00302504	0.0342705
LEOPARD Syndrome	0.00302504	0.0342705
Fibroadenoma of breast	5.49281e-06	0.000525479
Acute kidney injury	0.00181689	0.0246034
Parkinson Disease	0.000911914	0.0150928
Diverticular disease of colon	0.000112055	0.00459425
Mucosal telangiectasiae	0.00173118	0.0240411
Mandibulofacial Dysostosis	0.00302504	0.0342705
Hamartomatous polyp	0.000601318	0.0117667
Congenital small ears	0.00153064	0.0216045
NEVUS, EPIDERMAL (disorder)	5.35032e-05	0.00260884
Liver carcinoma	0.00406236	0.0421409
Dysgerminoma	0.000182411	0.00604062
Malformations of Cortical Development	0.00107398	0.0168126
Dermoid choristoma of eye proper	0.000929055	0.0150928
Depressive disorder	0.000139561	0.00546191
Strawberry nevus of skin	1.84782e-05	0.00133358
Polyp of large intestine	0.000288058	0.00770833
Lymphangioma	0.000313347	0.00770833
Thyroid Gland Follicular Adenoma	0.000426466	0.00941506
Benign neoplasm of eye, unspecified	0.000929055	0.0150928
Malignant melanoma of iris	9.56556e-08	4.11797e-05
Malignant melanoma of choroid	5.49281e-06	0.000525479
Hamartoma Syndrome, Multiple	0.000601318	0.0117667
Abnormality of the urinary system	0.000452162	0.0094954
Fibrous skin tumor of tuberous sclerosis	0.00368403	0.0386824
Squamous cell carcinoma of the head and neck	0.00182883	0.0246034
Anemia, Diamond-Blackfan	0.000240975	0.00715445
Fissured tongue	0.00311019	0.0343317
Proteus Syndrome	0.000313347	0.00770833
SPINOCEREBELLAR ATAXIA 17	0.000426466	0.00941506
Anemia, Macrocytic	0.000240975	0.00715445
Uveal melanoma	3.88017e-07	0.000111361
Congenital macrodactylia	2.16843e-05	0.00133358
Sebaceous adenoma	0.00368403	0.0386824
Frontal bossing	0.00187907	0.0248905
Acute Coronary Syndrome	2.11799e-05	0.00133358
Intermittent migraine headaches	0.00271973	0.0334527
Congenital bronchogenic cyst	0.000929055	0.0150928
Congenital arteriovenous malformation	6.3331e-06	0.00054528
Reperfusion Injury	0.0041574	0.0426133
INCLUSION BODY MYOPATHY WITH EARLY-ONSET PAGET DISEASE AND FRONTOTEMPORAL DEMENTIA	5.49281e-06	0.000525479
Micrognathism	0.00122718	0.0182172
Hemangioma, Cavernous	0.000371131	0.00887621
Port-Wine Stain	0.000288058	0.00770833
Upper limb asymmetry	0.000929055	0.0150928
Subcutaneous lipomas	0.000426466	0.00941506
#cerebellum Purkinje cells
Disease Name	p-value	corr p-value
Anemia, Macrocytic	0.000837097	0.0112898
Sezary Syndrome	0.00403631	0.0353608
Pseudohypoparathyroidism, Type Ia	0.000604932	0.00925455
Low set ears	0.00169554	0.0182988
Albright's hereditary osteodystrophy	0.000604932	0.00925455
Congenital arteriovenous malformation	2.32543e-05	0.00134257
Congenital bronchogenic cyst	0.00178525	0.0182988
Subcutaneous lipomas	0.00111173	0.0142441
Melanocytic nevus	0.00390118	0.0344717
Upper limb asymmetry	0.00178525	0.0182988
Micrognathism	0.000153203	0.00447172
Pseudopseudohypoparathyroidism	0.000604932	0.00925455
Dysgerminoma	1.18561e-05	0.00108175
Micronodular cirrhosis	0.00275656	0.0264063
Ovarian Cysts	0.000522503	0.00925455
Hamartomatous polyp	0.00155944	0.0179598
Benign neoplasm of eye, unspecified	0.00178525	0.0182988
BREAST-OVARIAN CANCER, FAMILIAL, SUSCEPTIBILITY TO, 1	0.00351887	0.0313639
Thyroid Gland Follicular Adenoma	0.00111173	0.0142441
Lymphangioma	0.000604932	0.00925455
Polyp of large intestine	0.000754839	0.010746
Fibrous Dysplasia, Monostotic	0.000604932	0.00925455
Multiple, subcutaneous nodules	0.000372155	0.00871941
Abnormality of the urinary system	0.00154505	0.0179598
Bicuspid aortic valve	0.00652474	0.0491754
Thyroiditis	5.80229e-05	0.0025858
Romano-Ward Syndrome	0.00539839	0.0443846
Mental Depression	2.35768e-05	0.00134257
Enchondromatosis	0.00575917	0.0443846
Hyperparathyroidism	0.00351887	0.0313639
Intestinal Polyposis	0.000480495	0.00925455
Acquired cubitus valgus	0.000837097	0.0112898
Hypoplastic mandible condyle	0.000153203	0.00447172
Thyrotoxicosis due to pituitary thyroid hormone resistance	0.000604932	0.00925455
Syndactyly	6.48903e-05	0.00275097
LEOPARD Syndrome	0.000142416	0.00447172
Atypical absence seizure	0.00575917	0.0443846
Lymphedema	0.00185231	0.0187982
Endometrial Hyperplasia	0.00575917	0.0443846
Endogenous depression	0.00027965	0.00699124
Mucosal telangiectasiae	0.00439786	0.0382018
Pseudohypoparathyroidism Type 1C	0.000604932	0.00925455
Hip Dysplasia	0.00178525	0.0182988
Parkinson Disease	0.000161418	0.00447172
Epileptic encephalopathy	0.00350504	0.0313639
Osteoma cutis	0.000604932	0.00925455
Brain Ischemia	0.00188437	0.0189361
Acth-Independent Macronodular Adrenal Hyperplasia	0.00351247	0.0313639
Aortic valve calcification	0.00575917	0.0443846
Mandibular hypoplasia	0.000153203	0.00447172
melanoma	2.26633e-05	0.00134257
Factor XII Deficiency	0.00575917	0.0443846
Senile lentigo	0.00155944	0.0179598
LONG QT SYNDROME 14	1.47751e-05	0.00108175
Pseudohypoaldosteronism	0.00351887	0.0313639
CEROID LIPOFUSCINOSIS, NEURONAL, 6	0.00027965	0.00699124
Malignant melanoma of ciliary body	1.47751e-05	0.00108175
Phencyclidine Abuse	0.000754839	0.010746
Conjunctival hamartoma	0.000480495	0.00925455
McCune-Albright Syndrome	0.000604932	0.00925455
VENTRICULAR TACHYCARDIA, CATECHOLAMINERGIC POLYMORPHIC, 4	1.47751e-05	0.00108175
Gastrointestinal hamartomatous polyps	0.00155944	0.0179598
Phakomatosis cesioflammea	0.000604932	0.00925455
Schizophrenia	1.06454e-05	0.00108175
Trigeminal Neuralgia	0.000152122	0.00447172
Marijuana Abuse	0.000157852	0.00447172
Retinal Detachment	0.00117389	0.0148548
Severe sensorineural hearing impairment	0.00575917	0.0443846
Proteus Syndrome	0.000604932	0.00925455
Neurofibrosarcoma	0.00575917	0.0443846
Myocardial Ischemia	0.000317025	0.00773691
Frontal bossing	0.00538197	0.0443846
Multiple lentigines	0.00155944	0.0179598
Congenital macrodactylia	5.80229e-05	0.0025858
Uveal melanoma	1.97923e-06	0.000676237
Congenital Epicanthus	0.00449351	0.0387046
Megalanecephaly Polymicrogyria-Polydactyly Hydrocephalus Syndrome	0.00351247	0.0313639
Polyostotic fibrous dysplasia	0.000604932	0.00925455
Meningioma	0.00219945	0.0216773
LONG QT SYNDROME 15	1.47751e-05	0.00108175
Syndactyly of fingers	0.00108111	0.0142069
INCLUSION BODY MYOPATHY WITH EARLY-ONSET PAGET DISEASE AND FRONTOTEMPORAL DEMENTIA	1.47751e-05	0.00108175
Port-Wine Stain	0.000754839	0.010746
Hemangioma, Cavernous	9.95216e-05	0.00392345
Anomalous pulmonary artery	0.00351247	0.0313639
ACTH-Secreting Pituitary Adenoma	0.00575917	0.0443846
Dermoid choristoma of eye proper	0.00178525	0.0182988
Substance Withdrawal Syndrome	4.68671e-05	0.00240194
NEVUS, EPIDERMAL (disorder)	0.000142416	0.00447172
Severe depression	0.000754839	0.010746
Congenital small ears	0.00628451	0.0477157
Depressive disorder	1.14981e-06	0.000589277
Strawberry nevus of skin	6.70969e-05	0.00275097
Hamartoma Syndrome, Multiple	0.00155944	0.0179598
Malignant melanoma of choroid	1.47751e-05	0.00108175
Malignant Peripheral Nerve Sheath Tumor	0.00351247	0.0313639
Malignant melanoma of iris	3.5919e-07	0.000368169
Hypothyroidism	0.00134393	0.0165967
Squamous cell carcinoma of the head and neck	0.00595038	0.045516
Anemia, Diamond-Blackfan	0.000837097	0.0112898
Short fifth metatarsal	0.00178525	0.0182988
Pseudohypoparathyroidism Type 1B	0.00178525	0.0182988
Cafe au lait spots, multiple	5.72586e-05	0.0025858
Hyperthyroidism	2.13198e-05	0.00134257
Cleft Palate	0.00125615	0.0157019
Osteoma	0.000604932	0.00925455
Hyperphosphatemia (disorder)	0.000837097	0.0112898
Squamous cell carcinoma	3.74371e-05	0.00201963
VENTRICULAR TACHYCARDIA, CATECHOLAMINERGIC POLYMORPHIC, 1 (disorder)	0.000480495	0.00925455
Cardiac Arrest	0.00275656	0.0264063
Fibroadenoma of breast	1.47751e-05	0.00108175
Vascular ring	0.00178525	0.0182988
Visceral angiomatosis	0.000215504	0.00566388
Angle class 2 malocclusion	0.000465095	0.00925455
Mandibulofacial Dysostosis	0.000142416	0.00447172
Constrictive median neuropathy	0.00178525	0.0182988
Diverticular disease of colon	0.000395753	0.00901436
Pulmonary Stenosis	0.00475879	0.040648
Primary hypercorticolism	0.00575917	0.0443846
Leukemia, T-Cell	0.00575917	0.0443846
Lennox-Gastaut syndrome	0.00575917	0.0443846
Pseudohypoparathyroidism	0.000142416	0.00447172
Varicocele	1.47751e-05	0.00108175
Adult T-Cell Lymphoma/Leukemia	0.00087468	0.0116435
Epilepsy, Temporal Lobe	0.00219945	0.0216773
Abnormality of the penis	0.000480495	0.00925455
Ovarian papillary adenocarcinoma	0.000142416	0.00447172
Angioid Streaks	0.000480495	0.00925455
Hypocalcemic tetany	0.000604932	0.00925455
Tachycardia, Ventricular	0.00258899	0.0252735
Thrombophlebitis	0.00178525	0.0182988
Hypoplasia of the maxilla	4.2353e-06	0.00108175
Malocclusion	0.000465095	0.00925455
Pectus excavatum	0.000167598	0.00452073
Testicular Hydrocele	0.000754839	0.010746
Breast Carcinoma	0.000374297	0.00871941
#cerebral cortex endothelial cells
Disease Name	p-value	corr p-value
Hypoplastic mandible condyle	9.29164e-06	0.000669617
Acquired cubitus valgus	0.000378124	0.00759702
Bipolar Disorder	8.87574e-05	0.00369026
Enchondromatosis	0.00381425	0.0361684
Single major depressive episode	1.7926e-05	0.0010199
Mental Depression	0.00223061	0.0264977
Streptococcal pneumonia	0.0056464	0.045213
Thyroiditis	1.53905e-07	5.54572e-05
Abnormality of the metaphyses	0.00256687	0.028904
Pulmonary arterial hypertension	0.00112153	0.0158763
Mucosal telangiectasiae	0.000131676	0.00474473
Cardio-facio-cutaneous syndrome	0.0056464	0.045213
Lymphedema	0.000849246	0.0135005
Uranostaphyloschisis	5.73124e-06	0.000669617
Endometrial Hyperplasia	0.00381425	0.0361684
LEOPARD Syndrome	0.00381425	0.0361684
Leukemia, Myelocytic, Acute	0.00300625	0.031551
Irregular metacarpals	0.000396871	0.00759702
Factor XII Deficiency	0.00381425	0.0361684
Mandibular hypoplasia	9.29164e-06	0.000669617
melanoma	0.0039582	0.0372071
Osteoporosis	0.00169435	0.0215482
Idiopathic pulmonary arterial hypertension	0.00112153	0.0158763
Aortic valve calcification	0.00381425	0.0361684
Inflammatory Myofibroblastic Tumor	0.0056464	0.045213
Marijuana Abuse	0.00446928	0.0402608
Retinal Detachment	0.00400494	0.0373219
Phakomatosis cesioflammea	0.000396871	0.00759702
Schizophrenia	0.00014646	0.005035
Trigeminal Neuralgia	0.0015096	0.0196612
Gastrointestinal hamartomatous polyps	0.000848043	0.0135005
Conjunctival hamartoma	0.000258551	0.00675
CEROID LIPOFUSCINOSIS, NEURONAL, 6	0.000149945	0.005035
Malignant melanoma of ciliary body	7.83817e-06	0.000669617
Agyria	0.00298745	0.031551
Low set ears	0.000262257	0.00675
Acute Coronary Syndrome	4.12294e-05	0.00193778
Fissured tongue	0.00433572	0.0397196
Acquired scoliosis	0.00472944	0.041906
Polymicrogyria	0.00256687	0.028904
SPINOCEREBELLAR ATAXIA 17	1.7926e-05	0.0010199
Anemia, Macrocytic	0.000378124	0.00759702
Costello syndrome (disorder)	0.0056464	0.045213
Micrognathism	9.29164e-06	0.000669617
Upper limb asymmetry	0.00117494	0.0158763
Subcutaneous lipomas	0.000602453	0.0106763
Congenital bronchogenic cyst	0.00117494	0.0158763
Congenital arteriovenous malformation	1.01165e-05	0.000683499
Lissencephaly	0.00298745	0.031551
Lymphangioma	0.000396871	0.00759702
Polyp of large intestine	0.000407611	0.00759702
Thyroid Gland Follicular Adenoma	0.000602453	0.0106763
Benign neoplasm of eye, unspecified	0.00117494	0.0158763
Ovarian Cysts	0.00140405	0.018738
Agoraphobia	0.00231898	0.0266683
Hamartomatous polyp	0.000848043	0.0135005
Dysgerminoma	0.000258551	0.00675
Cortical Dysplasia	0.00193382	0.0232273
Malformations of Cortical Development	0.0015096	0.0196612
Carcinoma, Pancreatic Ductal	0.000580299	0.0106323
Abnormality of the urinary system	4.7133e-05	0.00212295
Bicuspid aortic valve	0.000232037	0.00675
Multiple, subcutaneous nodules	0.0046626	0.0416551
Squamous cell carcinoma	1.85265e-10	2.00272e-07
Amegakaryocytic thrombocytopenia	0.0056464	0.045213
Transitional cell carcinoma of bladder	0.000298727	0.00746412
Cleft Palate	2.08341e-06	0.00037536
Microstomia	0.000153705	0.005035
Cafe au lait spots, multiple	0.00512724	0.0433012
Hyperthyroidism	0.00298745	0.031551
Byzanthine arch palate	0.00178949	0.0224935
Mandibulofacial Dysostosis	0.00381425	0.0361684
Diverticular disease of colon	0.00298745	0.031551
Vascular ring	0.00117494	0.0158763
Visceral angiomatosis	9.55387e-05	0.00382509
Neurogenic Urinary Bladder	0.0056464	0.045213
Angle class 2 malocclusion	0.000128083	0.00474473
Leiomyosarcoma of uterus	0.00193382	0.0232273
Fibroadenoma of breast	7.83817e-06	0.000669617
Short distal phalanx of hallux	0.000396871	0.00759702
Ovarian papillary adenocarcinoma	0.00381425	0.0361684
Blepharoptosis	0.00287427	0.031551
Abnormality of the penis	0.000258551	0.00675
Epilepsy	0.000826857	0.0135005
Diffuse Large B-Cell Lymphoma	0.00446928	0.0402608
Fused cervical vertebrae	0.00381425	0.0361684
T-Cell Lymphoma	0.00193382	0.0232273
Varicocele	7.83817e-06	0.000669617
Leukemia, T-Cell	0.00381425	0.0361684
Prominent epicanthal folds	0.00117494	0.0158763
Penile hypospadias	0.00521823	0.0437279
Malocclusion	0.000128083	0.00474473
Hereditary nonpolyposis colorectal carcinoma	0.00512724	0.0433012
Testicular Hydrocele	0.000407611	0.00759702
Pectus excavatum	0.000164504	0.00508082
Breast Carcinoma	0.00163092	0.0209884
Patent ductus arteriosus	0.00083384	0.0135005
ovarian neoplasm	0.00095847	0.015016
Global developmental delay	0.00111754	0.0158763
Thrombophlebitis	0.00117494	0.0158763
Hypoplasia of the maxilla	6.25664e-07	0.000150879
Frontometaphyseal dysplasia	0.000396871	0.00759702
Angioid Streaks	0.000258551	0.00675
Uveal melanoma	6.97868e-07	0.000150879
Congenital macrodactylia	3.0891e-05	0.00159015
Frontal bossing	1.43017e-05	0.000909423
Sebaceous adenoma	0.00512724	0.0433012
Myocardial Ischemia	0.000162826	0.00508082
Proteus Syndrome	0.000396871	0.00759702
Neurofibrosarcoma	0.00381425	0.0361684
Reperfusion Injury	0.000303812	0.00746412
Syndactyly of fingers	0.00035655	0.00759702
INCLUSION BODY MYOPATHY WITH EARLY-ONSET PAGET DISEASE AND FRONTOTEMPORAL DEMENTIA	7.83817e-06	0.000669617
Port-Wine Stain	0.000407611	0.00759702
Hemangioma, Cavernous	3.64977e-05	0.00179337
Intermittent migraine headaches	0.00485768	0.0426923
Meningioma	0.00101215	0.0156305
Paranoid Schizophrenia	0.00512724	0.0433012
Megalanecephaly Polymicrogyria-Polydactyly Hydrocephalus Syndrome	0.00231898	0.0266683
Depressive disorder	0.000234241	0.00675
Strawberry nevus of skin	2.94115e-05	0.00158969
NEVUS, EPIDERMAL (disorder)	7.60912e-05	0.00329018
Severe depression	0.000407611	0.00759702
Substance Withdrawal Syndrome	0.000679816	0.0118529
Liver carcinoma	0.00352018	0.0361684
Dermoid choristoma of eye proper	0.00117494	0.0158763
Anhedonia	0.00188505	0.0232273
Fibrous skin tumor of tuberous sclerosis	0.00512724	0.0433012
Squamous cell carcinoma of the head and neck	0.00280972	0.0313125
Anemia, Diamond-Blackfan	0.000378124	0.00759702
Respiratory Failure	0.0042809	0.0395526
Malignant Peripheral Nerve Sheath Tumor	0.00231898	0.0266683
Malignant melanoma of iris	1.53905e-07	5.54572e-05
Malignant melanoma of choroid	7.83817e-06	0.000669617
Hamartoma Syndrome, Multiple	0.000848043	0.0135005
#cerebral cortex glial cells
Disease Name	p-value	corr p-value
Severe sensorineural hearing impairment	0.00322421	0.0450086
Pseudohypoparathyroidism, Type Ia	0.000334371	0.0113439
Albright's hereditary osteodystrophy	0.000334371	0.0113439
Acute Coronary Syndrome	2.54529e-05	0.00466297
Low set ears	0.00178576	0.0340782
Congenital macrodactylia	0.0019581	0.0344927
Polyostotic fibrous dysplasia	0.000334371	0.0113439
Congenital Epicanthus	0.0015764	0.030723
Micrognathism	0.000157854	0.0103282
Syndactyly of fingers	0.000224769	0.0113439
INCLUSION BODY MYOPATHY WITH EARLY-ONSET PAGET DISEASE AND FRONTOTEMPORAL DEMENTIA	6.05674e-06	0.00138699
Pseudopseudohypoparathyroidism	0.000334371	0.0113439
Anomalous pulmonary artery	0.0019581	0.0344927
Dysgerminoma	3.65419e-06	0.00111575
Substance Withdrawal Syndrome	0.00043213	0.0141368
NEVUS, EPIDERMAL (disorder)	0.00322421	0.0450086
ACTH-Secreting Pituitary Adenoma	0.00322421	0.0450086
Fibrous Dysplasia, Monostotic	0.000334371	0.0113439
Depressive disorder	0.000605801	0.0179005
BREAST-OVARIAN CANCER, FAMILIAL, SUSCEPTIBILITY TO, 1	0.00151287	0.0301258
Hypothyroidism	0.00212205	0.0366755
Dysarthria	0.000786768	0.0225212
Multiple, subcutaneous nodules	0.0032379	0.0450086
Bicuspid aortic valve	0.00284497	0.0450086
Short fifth metatarsal	0.000991	0.0226939
Cleft Palate	0.0010563	0.022989
Thyroiditis	0.0019581	0.0344927
Pseudohypoparathyroidism Type 1B	0.000991	0.0226939
Hyperthyroidism	0.000127045	0.0103282
Mental Depression	0.00102847	0.0229775
Osteoma	0.000334371	0.0113439
Hypoplastic mandible condyle	0.000157854	0.0103282
Squamous cell carcinoma	1.82091e-06	0.00111575
Endogenous depression	0.000116299	0.0103282
Angle class 2 malocclusion	0.000580332	0.0177195
Thyrotoxicosis due to pituitary thyroid hormone resistance	0.000334371	0.0113439
Fibroadenoma of breast	0.000991	0.0226939
LEOPARD Syndrome	0.00322421	0.0450086
Syndactyly	0.000958308	0.0226939
Uranostaphyloschisis	0.00355249	0.0478541
Primary hypercorticolism	0.00322421	0.0450086
Osteoma cutis	0.000334371	0.0113439
Hip Dysplasia	0.000991	0.0226939
Pseudohypoparathyroidism Type 1C	0.000334371	0.0113439
Constrictive median neuropathy	0.000991	0.0226939
Mandibulofacial Dysostosis	0.00322421	0.0450086
Diverticular disease of colon	0.00234285	0.0397417
Parkinson Disease	0.00107918	0.022989
Diffuse Large B-Cell Lymphoma	0.00329212	0.0450086
Osteoporosis	0.000885992	0.0226939
Leukemia, T-Cell	0.00322421	0.0450086
Acth-Independent Macronodular Adrenal Hyperplasia	0.0019581	0.0344927
Penile hypospadias	0.00326579	0.0450086
Aortic valve calcification	0.00322421	0.0450086
Pseudohypoparathyroidism	5.89439e-05	0.00771323
Mandibular hypoplasia	0.000157854	0.0103282
Glioblastoma	0.00280816	0.0450086
Varicocele	0.000991	0.0226939
Pseudohypoaldosteronism	0.00151287	0.0301258
Ovarian papillary adenocarcinoma	5.89439e-05	0.00771323
McCune-Albright Syndrome	0.000334371	0.0113439
Hypocalcemic tetany	0.000334371	0.0113439
CEROID LIPOFUSCINOSIS, NEURONAL, 6	0.000116299	0.0103282
Malocclusion	0.000580332	0.0177195
Breast Carcinoma	0.00118906	0.024754
Schizophrenia	0.000247477	0.0113439
Pectus excavatum	8.55703e-05	0.0097978
Hypoplasia of the maxilla	2.8317e-06	0.00111575
#cerebral cortex neuronal cells
Disease Name	p-value	corr p-value
Acute kidney injury	0.00267053	0.0273473
Osteoma cutis	0.000663773	0.010551
Epileptic encephalopathy	0.00413756	0.0364174
Parkinson Disease	0.000221835	0.00675013
Pseudohypoparathyroidism Type 1C	0.000663773	0.010551
Hip Dysplasia	0.00195734	0.0210563
Mucosal telangiectasiae	0.00500772	0.0430098
Endogenous depression	0.000320675	0.00794229
Endometrial Hyperplasia	0.00630442	0.0496009
Lymphedema	0.00219465	0.0233731
Atypical absence seizure	0.00630442	0.0496009
LEOPARD Syndrome	0.00630442	0.0496009
Syndactyly	8.69419e-05	0.00462966
Thyrotoxicosis due to pituitary thyroid hormone resistance	0.000663773	0.010551
Intestinal Polyposis	0.000550496	0.010551
Hypoplastic mandible condyle	0.00027309	0.00709367
Acquired cubitus valgus	0.000995502	0.0143272
Bipolar Disorder	8.63657e-06	0.00139171
Uterine Cervical Neoplasm	0.00413756	0.0364174
Hyperparathyroidism	0.00401032	0.0358907
Enchondromatosis	0.00630442	0.0496009
Single major depressive episode	4.92323e-05	0.00327703
Mental Depression	3.72918e-06	0.000794314
Romano-Ward Syndrome	0.00614165	0.0496009
Thyroiditis	6.66535e-05	0.00394366
Pancreatic Neoplasm	0.0018976	0.0210563
Marijuana Abuse	0.000203249	0.0065172
Trigeminal Neuralgia	0.000181928	0.00625012
Schizophrenia	2.29679e-09	2.44609e-06
Gastrointestinal hamartomatous polyps	0.0017819	0.0210563
VENTRICULAR TACHYCARDIA, CATECHOLAMINERGIC POLYMORPHIC, 4	1.6988e-05	0.00139171
McCune-Albright Syndrome	0.000663773	0.010551
Conjunctival hamartoma	0.000550496	0.010551
Phencyclidine Abuse	0.000864044	0.0129607
Unipolar Depression	0.000106529	0.00515699
CEROID LIPOFUSCINOSIS, NEURONAL, 6	0.000320675	0.00794229
Pseudohypoaldosteronism	0.00401032	0.0358907
LONG QT SYNDROME 14	1.6988e-05	0.00139171
Factor XII Deficiency	0.00630442	0.0496009
melanoma	0.00138726	0.0184679
Mandibular hypoplasia	0.00027309	0.00709367
Acth-Independent Macronodular Adrenal Hyperplasia	0.00384803	0.0358907
Aortic valve calcification	0.00630442	0.0496009
Brain Ischemia	0.00251682	0.0265353
Alcoholic Intoxication, Chronic	0.00362956	0.0351407
Pseudopseudohypoparathyroidism	0.000663773	0.010551
Micrognathism	0.00027309	0.00709367
Upper limb asymmetry	0.00195734	0.0210563
Subcutaneous lipomas	0.00127145	0.0173602
Congenital bronchogenic cyst	0.00195734	0.0210563
Congenital arteriovenous malformation	0.000864044	0.0129607
Albright's hereditary osteodystrophy	0.000663773	0.010551
SPINOCEREBELLAR ATAXIA 17	0.00127145	0.0173602
Pseudohypoparathyroidism, Type Ia	0.000663773	0.010551
Anemia, Macrocytic	0.000995502	0.0143272
Abnormality of the urinary system	0.0018323	0.0210563
Multiple, subcutaneous nodules	0.000492084	0.010551
Fibrous Dysplasia, Monostotic	0.000663773	0.010551
Polyp of large intestine	0.000864044	0.0129607
Lymphangioma	0.000663773	0.010551
Thyroid Gland Follicular Adenoma	0.00127145	0.0173602
BREAST-OVARIAN CANCER, FAMILIAL, SUSCEPTIBILITY TO, 1	0.00401032	0.0358907
Benign neoplasm of eye, unspecified	0.00195734	0.0210563
Hamartomatous polyp	0.0017819	0.0210563
Ovarian Cysts	0.00428551	0.0374104
Malformations of Cortical Development	0.00314428	0.0310061
Micronodular cirrhosis	0.00314428	0.0310061
Dysgerminoma	1.42464e-05	0.00139171
Primary hypercorticolism	0.00630442	0.0496009
Diverticular disease of colon	0.000471963	0.010551
Mandibulofacial Dysostosis	0.000163453	0.00580259
Constrictive median neuropathy	0.00195734	0.0210563
Angle class 2 malocclusion	0.000613735	0.010551
Visceral angiomatosis	0.000257486	0.00709367
Vascular ring	0.00195734	0.0210563
Fibroadenoma of breast	1.6988e-05	0.00139171
Squamous cell carcinoma	9.82991e-09	5.23443e-06
VENTRICULAR TACHYCARDIA, CATECHOLAMINERGIC POLYMORPHIC, 1 (disorder)	0.000550496	0.010551
Cardiac Arrest	0.00314428	0.0310061
Osteoma	0.000663773	0.010551
Microstomia	0.0038855	0.0358907
Cleft Palate	0.00190544	0.0210563
Hyperthyroidism	2.66673e-05	0.00198204
Cafe au lait spots, multiple	7.14098e-05	0.00400271
Pseudohypoparathyroidism Type 1B	0.00195734	0.0210563
Breast Carcinoma	0.000463175	0.010551
Pectus excavatum	0.000244247	0.00709367
Testicular Hydrocele	0.000864044	0.0129607
Malocclusion	0.000613735	0.010551
Hypoplasia of the maxilla	8.17596e-07	0.000217685
Thrombophlebitis	0.00195734	0.0210563
Tachycardia, Ventricular	0.00306184	0.0310061
ovarian neoplasm	0.00476248	0.0412361
Hypocalcemic tetany	0.000663773	0.010551
Angioid Streaks	0.000550496	0.010551
Ki-1+ Anaplastic Large Cell Lymphoma	0.00384803	0.0358907
Status Epilepticus	0.00129981	0.0175228
Ovarian papillary adenocarcinoma	0.000163453	0.00580259
Abnormality of the penis	0.000550496	0.010551
Epilepsy, Temporal Lobe	0.000252374	0.00709367
Adult T-Cell Lymphoma/Leukemia	0.00107716	0.0152956
Varicocele	1.6988e-05	0.00139171
Pseudohypoparathyroidism	0.000163453	0.00580259
T-Cell Lymphoma	0.00401032	0.0358907
Lennox-Gastaut syndrome	0.00630442	0.0496009
Leukemia, T-Cell	0.000163453	0.00580259
Reperfusion Injury	0.00163687	0.0210563
Hemangioma, Cavernous	0.000123875	0.00573595
Syndactyly of fingers	0.000208061	0.0065172
INCLUSION BODY MYOPATHY WITH EARLY-ONSET PAGET DISEASE AND FRONTOTEMPORAL DEMENTIA	1.6988e-05	0.00139171
LONG QT SYNDROME 15	1.6988e-05	0.00139171
Meningioma	0.00260355	0.0269202
Polyostotic fibrous dysplasia	0.000663773	0.010551
Megalanecephaly Polymicrogyria-Polydactyly Hydrocephalus Syndrome	0.00384803	0.0358907
Congenital Epicanthus	0.00633402	0.0496009
Congenital macrodactylia	6.66535e-05	0.00394366
Frontal bossing	0.000202977	0.0065172
Myocardial Ischemia	0.000138939	0.00580259
Proteus Syndrome	0.000663773	0.010551
Neurofibrosarcoma	0.00630442	0.0496009
Major Depressive Disorder	0.000142932	0.00580259
Short fifth metatarsal	0.00195734	0.0210563
Anemia, Diamond-Blackfan	0.000995502	0.0143272
Squamous cell carcinoma of the head and neck	9.78191e-05	0.00496083
Memory Disorders	0.00345597	0.0337671
Hypothyroidism	0.00170323	0.0210563
Malignant Peripheral Nerve Sheath Tumor	0.00384803	0.0358907
Hamartoma Syndrome, Multiple	0.0017819	0.0210563
Strawberry nevus of skin	0.0017819	0.0210563
Depressive disorder	2.86595e-07	0.000101741
Severe depression	2.7916e-05	0.00198204
NEVUS, EPIDERMAL (disorder)	0.000163453	0.00580259
Substance Withdrawal Syndrome	0.00254141	0.0265353
Dermoid choristoma of eye proper	0.00195734	0.0210563
Anhedonia	0.000556617	0.010551
ACTH-Secreting Pituitary Adenoma	0.00630442	0.0496009
#cerebral cortex neuronal projections
Disease Name	p-value	corr p-value
#cerebral cortex neuropil
Disease Name	p-value	corr p-value
Vascular ring	0.00123033	0.0199313
Angle class 2 malocclusion	1.82995e-05	0.00127051
Endogenous depression	0.00016061	0.00780563
Thyrotoxicosis due to pituitary thyroid hormone resistance	0.000415711	0.00942391
Syndactyly	0.000190925	0.00816705
LEOPARD Syndrome	0.00399154	0.0412743
Fibroadenoma of breast	0.00123033	0.0199313
Atypical absence seizure	0.00399154	0.0412743
Osteoma cutis	0.000415711	0.00942391
Primary hypercorticolism	0.00399154	0.0412743
Epileptic encephalopathy	0.00177572	0.0253823
Constrictive median neuropathy	0.00123033	0.0199313
Pseudohypoparathyroidism Type 1C	0.000415711	0.00942391
Diverticular disease of colon	0.00318983	0.0382779
Single major depressive episode	0.000644618	0.0122857
Microstomia	0.00510418	0.0496126
Pseudohypoparathyroidism Type 1B	0.00123033	0.0199313
Romano-Ward Syndrome	0.00318983	0.0382779
Cafe au lait spots, multiple	0.000412918	0.00942391
Mental Depression	1.51854e-06	0.000246003
Anxiety disease	0.00329308	0.0385648
Hyperthyroidism	0.000193253	0.00816705
Thyroiditis	3.31115e-05	0.0018932
Squamous cell carcinoma	9.1287e-07	0.000221827
Cardiac Arrest	0.00161355	0.0234086
VENTRICULAR TACHYCARDIA, CATECHOLAMINERGIC POLYMORPHIC, 1 (disorder)	0.000276841	0.00942391
Osteoma	0.000415711	0.00942391
Hyperphosphatemia (disorder)	0.000412918	0.00942391
Bipolar Disorder	1.65736e-05	0.00127051
Intestinal Polyposis	0.000276841	0.00942391
Transitional cell carcinoma of bladder	0.00462623	0.0454212
Hypocalcemic tetany	0.000415711	0.00942391
Phencyclidine Abuse	0.000436292	0.00942391
McCune-Albright Syndrome	0.000415711	0.00942391
CEROID LIPOFUSCINOSIS, NEURONAL, 6	0.00016061	0.00780563
Malignant melanoma of ciliary body	8.40459e-06	0.00074266
Marijuana Abuse	0.00058056	0.0115164
Retinal Detachment	0.0043493	0.0431379
Malocclusion	1.82995e-05	0.00127051
Phakomatosis cesioflammea	0.000415711	0.00942391
Schizophrenia	1.00274e-08	9.7466e-06
Pectus excavatum	0.00429853	0.0431379
Trigeminal Neuralgia	0.00161355	0.0234086
Hyperprolactinemia	0.00122855	0.0199313
Tachycardia, Ventricular	0.00130295	0.0207618
Hypoplasia of the maxilla	0.00220724	0.0306491
VENTRICULAR TACHYCARDIA, CATECHOLAMINERGIC POLYMORPHIC, 4	8.40459e-06	0.00074266
Epilepsy, Temporal Lobe	0.00110323	0.0199313
Factor XII Deficiency	0.00399154	0.0412743
Anxiety	0.00329308	0.0385648
Pseudohypoparathyroidism	8.15318e-05	0.00440272
melanoma	0.00155224	0.0234086
Varicocele	0.00123033	0.0199313
Brain Ischemia	0.00269512	0.0340031
Leukemia, T-Cell	0.00399154	0.0412743
Osteoporosis	0.000549783	0.0111331
Acth-Independent Macronodular Adrenal Hyperplasia	0.00242754	0.0310469
Lennox-Gastaut syndrome	0.00399154	0.0412743
Pseudohypoaldosteronism	0.00206626	0.0291073
Status Epilepticus	0.000278141	0.00942391
LONG QT SYNDROME 14	8.40459e-06	0.00074266
Ovarian papillary adenocarcinoma	0.00399154	0.0412743
Epilepsy	0.000482503	0.0101955
Polyostotic fibrous dysplasia	0.000415711	0.00942391
Megalanecephaly Polymicrogyria-Polydactyly Hydrocephalus Syndrome	0.00242754	0.0310469
Congenital arteriovenous malformation	0.000436292	0.00942391
Pseudopseudohypoparathyroidism	0.000415711	0.00942391
Syndactyly of fingers	0.000403578	0.00942391
Port-Wine Stain	0.000436292	0.00942391
Hemangioma, Cavernous	0.000633224	0.0122857
LONG QT SYNDROME 15	8.40459e-06	0.00074266
Myocardial Ischemia	0.00272865	0.0340031
Fibrosis Of Extraocular Muscles, Congenital, 1	0.00242754	0.0310469
Neurofibrosarcoma	0.00399154	0.0412743
Polymicrogyria	0.00283761	0.0349133
Pseudohypoparathyroidism, Type Ia	0.000415711	0.00942391
Nephrolithiasis	0.0043493	0.0431379
Albright's hereditary osteodystrophy	0.000415711	0.00942391
Uveal melanoma	3.22144e-05	0.0018932
Congenital macrodactylia	0.00242754	0.0310469
Frontal bossing	0.00138745	0.0217516
Acute Coronary Syndrome	0.000503426	0.0104113
Hypothyroidism	0.00339794	0.0393191
Malignant Peripheral Nerve Sheath Tumor	0.00242754	0.0310469
Malignant melanoma of iris	3.31115e-05	0.0018932
Malignant melanoma of choroid	8.40459e-06	0.00074266
Short fifth metatarsal	0.00123033	0.0199313
Ovarian Cysts	0.00155569	0.0234086
NEVUS, EPIDERMAL (disorder)	0.00399154	0.0412743
Severe depression	1.79882e-07	5.82819e-05
Agoraphobia	0.00242754	0.0310469
Dysgerminoma	0.000276841	0.00942391
Substance Withdrawal Syndrome	1.22573e-06	0.000238283
Malformations of Cortical Development	0.00161355	0.0234086
Liver carcinoma	0.00424347	0.0431379
ACTH-Secreting Pituitary Adenoma	0.00399154	0.0412743
Anhedonia	0.000189099	0.00816705
Fibrous Dysplasia, Monostotic	0.000415711	0.00942391
Depressive disorder	8.16686e-08	3.96909e-05
Strawberry nevus of skin	0.000907076	0.0169553
#cervix uterine glandular cells
Disease Name	p-value	corr p-value
Endometrial Hyperplasia	0.00417269	0.0371749
Thyrotoxicosis due to pituitary thyroid hormone resistance	0.000434988	0.0083586
Fibroadenoma of breast	8.99766e-06	0.000939412
Syndactyly	0.00171911	0.0205792
LEOPARD Syndrome	8.7223e-05	0.00388539
Vascular ring	0.00128697	0.0161696
Visceral angiomatosis	0.000114115	0.00486227
Endogenous depression	0.00017176	0.00673299
Endometrial Carcinoma	0.00617316	0.0461809
Parkinson Disease	0.000353757	0.0083586
Pseudohypoparathyroidism Type 1C	0.000434988	0.0083586
Mucosal telangiectasiae	0.00276258	0.0276258
Constrictive median neuropathy	0.00128697	0.0161696
Mandibulofacial Dysostosis	0.00417269	0.0371749
Diverticular disease of colon	0.000210824	0.00682598
Osteoma cutis	0.000434988	0.0083586
Byzanthine arch palate	0.0025662	0.0261967
Primary hypercorticolism	0.00417269	0.0371749
Cafe au lait spots, multiple	0.000449956	0.00846161
Pseudohypoparathyroidism Type 1B	0.00128697	0.0161696
Hyperthyroidism	9.58583e-06	0.000939412
Streptococcal pneumonia	0.00617316	0.0461809
Pancreatic Neoplasm	0.00237603	0.025588
Thyroiditis	3.54354e-05	0.00217042
Enchondromatosis	0.00417269	0.0371749
Cleft Palate	0.000930564	0.0143834
Microstomia	0.00569173	0.0452983
Hyperparathyroidism	0.00220428	0.0240021
Transitional cell carcinoma of bladder	0.00492838	0.0427417
Squamous cell carcinoma	3.8159e-10	3.73958e-07
Hyperphosphatemia (disorder)	0.00582406	0.0452983
Uterine Cervical Neoplasm	0.00192925	0.0222432
Osteoma	0.000434988	0.0083586
Acquired cubitus valgus	0.00582406	0.0452983
Intestinal Polyposis	0.000295956	0.00805657
Hypoplastic mandible condyle	0.000208719	0.00682598
Bipolar Disorder	0.00558382	0.0452983
Ki-1+ Anaplastic Large Cell Lymphoma	0.0025385	0.0261867
CEROID LIPOFUSCINOSIS, NEURONAL, 6	0.00617316	0.0461809
Malignant melanoma of ciliary body	8.99766e-06	0.000939412
Hypocalcemic tetany	0.000434988	0.0083586
Conjunctival hamartoma	0.000295956	0.00805657
Angioid Streaks	0.000295956	0.00805657
McCune-Albright Syndrome	0.000434988	0.0083586
ovarian neoplasm	0.00541777	0.0452983
Gastrointestinal hamartomatous polyps	0.000968681	0.0143834
Hypoplasia of the maxilla	6.3845e-05	0.00329306
Thrombophlebitis	0.00128697	0.0161696
Retinal Detachment	0.000558234	0.00994671
Phakomatosis cesioflammea	0.000434988	0.0083586
Breast Carcinoma	1.25089e-05	0.00102156
Trigeminal Neuralgia	0.00172193	0.0205792
Testicular Hydrocele	0.000466252	0.00846161
Pectus excavatum	0.000232121	0.0071087
Schizophrenia	0.000187072	0.00682598
melanoma	0.000582602	0.0100167
T-Cell Lymphoma	0.00220428	0.0240021
Glioblastoma	0.00534448	0.0452983
Pseudohypoparathyroidism	0.00417269	0.0371749
Mandibular hypoplasia	0.000208719	0.00682598
[truncated: 6,240 more rows]

## Sheet: Disease enrichment (Clusters)
Table S10: Disease term enrichment results per Cluster. Disease terms and gene-disease associations are from DisGeNET. The results are separated by the name of the cluster with a leading (#)-pound sign.
#Cluster 1
Disease Name	p-value	corr p-value
Anemia, Diamond-Blackfan	9.09729e-13	6.95943e-11
Anemia, Macrocytic	9.09729e-13	6.95943e-11
Abnormality of the urinary system	2.64882e-12	1.3509e-10
Intermittent migraine headaches	1.25771e-08	4.81076e-07
Triphalangeal thumb	7.72645e-07	2.3643e-05
Uranostaphyloschisis	1.10881e-06	2.82748e-05
Cleft Palate	3.08833e-06	6.7502e-05
Hypoplastic anemia	1.39887e-05	0.000237807
Erythroid hypoplasia	1.39887e-05	0.000237807
Osteosarcoma	0.000115981	0.00177451
Parkinson Disease	0.000354763	0.00493444
Thumb aplasia	0.000549994	0.00647301
Malignant tumor of colon	0.000549994	0.00647301
Hemangiosarcoma	0.000699388	0.00764331
Congenital hypoplasia of radius	0.00114888	0.0117185
PSEUDOHYPOALDOSTERONISM, TYPE IIE	0.00221989	0.0130632
Balkan Nephropathy	0.00221989	0.0130632
Diamond-Blackfan Anemia 1	0.00221989	0.0130632
Choroid Plexus Papilloma	0.00221989	0.0130632
Mercury Poisoning, Nervous System	0.00221989	0.0130632
Diamond-Blackfan Anemia 4	0.00221989	0.0130632
Diamond-Blackfan Anemia 7	0.00221989	0.0130632
Diamond-Blackfan Anemia 5	0.00221989	0.0130632
HYPOTRICHOSIS 12	0.00221989	0.0130632
Abnormality of the eyelid	0.00221989	0.0130632
Spinocerebellar ataxia 36	0.00221989	0.0130632
Adenocarcinoma, Clear Cell	0.0044351	0.0188492
Lymphoma, Primary Cutaneous Anaplastic Large Cell	0.0044351	0.0188492
LI-FRAUMENI SYNDROME 1	0.0044351	0.0188492
Vulvar Lichen Sclerosus	0.0044351	0.0188492
ADRENOCORTICAL CARCINOMA, HEREDITARY	0.0044351	0.0188492
Hyperchloremia	0.0044351	0.0188492
Chromosome 17 deletion	0.0044351	0.0188492
Acute Myeloid Leukemia, M1	0.0044351	0.0188492
Lymphomatoid Papulosis	0.0044351	0.0188492
Choroid Plexus Carcinoma	0.0044351	0.0188492
Acute Myeloid Leukemia (AML-M2)	0.00664566	0.0260714
Retinoblastoma	0.00664566	0.0260714
Li-Fraumeni Syndrome	0.00664566	0.0260714
Atrophy of tongue	0.00885156	0.0338572
Thymoma	0.0110528	0.0402639
Keratosis	0.0110528	0.0402639
melanoma	0.0113956	0.0405473
Acute blood cancer	0.0132495	0.0431312
Progressive brain disease	0.0132495	0.0431312
Partial duplication of thumb phalanx	0.0132495	0.0431312
Acute leukemia	0.0132495	0.0431312
Hypotrichosis simplex	0.0154415	0.0472509
Congenital dyserythropoietic anemia	0.0154415	0.0472509
Papilledema	0.0154415	0.0472509
Liver carcinoma	0.0158199	0.0474597
Leukemia, Megakaryoblastic, of Down Syndrome	0.0176289	0.0499485
Pancreatic carcinoma, familial	0.0176289	0.0499485
Brain Ischemia	0.0173546	0.0499485
#Cluster 2
Disease Name	p-value	corr p-value
Diamond-Blackfan Anemia 8	0.00058418	0.0058418
Abnormality of the urinary system	0.0122106	0.020351
alcohol use disorder	0.00757307	0.020351
Anemia, Macrocytic	0.0104735	0.020351
Alcoholic Intoxication, Chronic	0.010834	0.020351
Anemia, Diamond-Blackfan	0.0104735	0.020351
#Cluster 3
Disease Name	p-value	corr p-value
INCLUSION BODY MYOPATHY WITH EARLY-ONSET PAGET DISEASE AND FRONTOTEMPORAL DEMENTIA	1.55221e-07	6.16229e-05
Acute Coronary Syndrome	2.90653e-05	0.00576947
Leukemia, Myelocytic, Acute	4.93739e-05	0.00653381
Hypoxia-Ischemia, Brain	0.000292069	0.0231903
Cholangitis, Sclerosing	0.000292069	0.0231903
Noonan Syndrome 5	0.0054913	0.032538
INCLUSION BODY MYOPATHY WITH EARLY-ONSET PAGET DISEASE WITH OR WITHOUT FRONTOTEMPORAL DEMENTIA 3	0.0054913	0.032538
CORTICAL DYSPLASIA, COMPLEX, WITH OTHER BRAIN MALFORMATIONS 5	0.0054913	0.032538
DEAFNESS, AUTOSOMAL RECESSIVE 68	0.0054913	0.032538
SPINOCEREBELLAR ATAXIA 17	0.00103681	0.032538
Malignant mesothelioma	0.00291393	0.032538
AMYOTROPHIC LATERAL SCLEROSIS 22 WITH OR WITHOUT FRONTOTEMPORAL DEMENTIA	0.0054913	0.032538
DYSTONIA 4, TORSION, AUTOSOMAL DOMINANT (disorder)	0.0054913	0.032538
Agyria	0.00296117	0.032538
AMYOTROPHIC LATERAL SCLEROSIS 20	0.0054913	0.032538
Deafness, autosomal dominant nonsyndromic sensorineural 17	0.0054913	0.032538
CORTICAL DYSPLASIA, COMPLEX, WITH OTHER BRAIN MALFORMATIONS 1	0.0054913	0.032538
Leukodystrophy, Hypomyelinating, 6	0.0054913	0.032538
Manganese Poisoning	0.00157295	0.032538
CARDIOFACIOCUTANEOUS SYNDROME 3	0.0054913	0.032538
PARKINSON DISEASE 2, AUTOSOMAL RECESSIVE JUVENILE	0.0054913	0.032538
Lissencephaly	0.00296117	0.032538
CORTICAL DYSPLASIA, COMPLEX, WITH OTHER BRAIN MALFORMATIONS 6	0.0054913	0.032538
Hypoplasia of corpus callosum	0.00144399	0.032538
CARDIOMYOPATHY, DILATED, 1NN	0.0054913	0.032538
Degenerative polyarthritis	0.00387754	0.032538
Hodgkin Disease	0.00337238	0.032538
AU-KLINE SYNDROME	0.0054913	0.032538
Necrotizing Enterocolitis	0.0038087	0.032538
Acute kidney injury	0.000658425	0.032538
Atherosclerosis	0.00426606	0.032538
Frontotemporal dementia	0.00129147	0.032538
MENTAL RETARDATION, X-LINKED 102	0.0054913	0.032538
Nonprogressive restrictive external ophthalmoplegia	0.0054913	0.032538
EPILEPTIC ENCEPHALOPATHY, EARLY INFANTILE, 5	0.0054913	0.032538
SEBASTIAN SYNDROME	0.0054913	0.032538
Lissencephaly 3	0.0054913	0.032538
Noonan Syndrome	0.0038087	0.032538
CATARACT 30	0.0054913	0.032538
Acquired cubitus valgus	0.00426985	0.032538
Frontal cortical atrophy	0.0054913	0.032538
Paranoid Schizophrenia	0.00426985	0.032538
Ectodermal Dysplasia, Anhidrotic, With T-Cell Immunodeficiency, Autosomal Dominant	0.0054913	0.032538
Squamous cell carcinoma	0.00411778	0.032538
Asbestosis	0.00188094	0.032538
Brain Ischemia	0.00156645	0.032538
Fechtner syndrome (disorder)	0.0054913	0.032538
Synostosis of carpals/tarsals	0.0054913	0.032538
FIBROSIS OF EXTRAOCULAR MUSCLES, CONGENITAL, 3A, WITH OR WITHOUT EXTRAOCULAR INVOLVEMENT	0.0054913	0.032538
CHARCOT-MARIE-TOOTH DISEASE, AXONAL, TYPE 2Y	0.0054913	0.032538
Mitral Regurgitation, Conductive Deafness, and Fusion of Cervical Vertebrae and of Carpal and Tarsal Bones	0.0054913	0.032538
Diffuse nuclear cataract	0.0054913	0.032538
Abnormality of the palpebral fissures	0.0054913	0.032538
MACROTHROMBOCYTOPENIA AND PROGRESSIVE SENSORINEURAL DEAFNESS	0.0054913	0.032538
Senile lentigo	0.00129147	0.032538
INCLUSION BODY MYOPATHY WITH EARLY-ONSET PAGET DISEASE WITH OR WITHOUT FRONTOTEMPORAL DEMENTIA 2	0.0054913	0.032538
Epstein syndrome (disorder)	0.0054913	0.032538
Abnormality of the abdominal musculature	0.0054913	0.032538
Cortical Dysplasia	0.00221517	0.032538
LEOPARD SYNDROME 2	0.0054913	0.032538
Congenital absence of external ear	0.0054913	0.032538
DEAFNESS, AUTOSOMAL DOMINANT 17	0.0054913	0.032538
COCOON SYNDROME	0.0054913	0.032538
AMYOTROPHIC LATERAL SCLEROSIS 14 WITH OR WITHOUT FRONTOTEMPORAL DEMENTIA	0.0054913	0.032538
Multiple lentigines	0.00129147	0.032538
X-Linked Dyskeratosis Congenita	0.0054913	0.032538
Liver Cirrhosis, Experimental	0.00240597	0.032538
Lymphangioma, Cystic	0.00579952	0.033859
#Cluster 4
Disease Name	p-value	corr p-value
Substance Withdrawal Syndrome	2.76137e-05	0.00400399
Amnesia	0.000165548	0.0120022
Thyrotoxicosis due to pituitary thyroid hormone resistance	0.00233549	0.0141103
Albright's hereditary osteodystrophy	0.00233549	0.0141103
Phakomatosis cesioflammea	0.00233549	0.0141103
Polyostotic fibrous dysplasia	0.00233549	0.0141103
Osteoma	0.00233549	0.0141103
Osteoma cutis	0.00233549	0.0141103
Pseudohypoparathyroidism Type 1C	0.00233549	0.0141103
Failure of development of condylar head of mandible	0.00233549	0.0141103
Familial ventricular tachycardia	0.00116836	0.0141103
Sturge-Weber Syndrome	0.00233549	0.0141103
Hemangioma of choroid	0.00116836	0.0141103
Fibrous Dysplasia, Monostotic	0.00233549	0.0141103
Pseudopseudohypoparathyroidism	0.00233549	0.0141103
Pseudohypoparathyroidism, Type Ia	0.00233549	0.0141103
Failure of development of condylar neck of mandible	0.00233549	0.0141103
Osteoporosis	0.000764213	0.0141103
Hypocalcemic tetany	0.00233549	0.0141103
EPILEPTIC ENCEPHALOPATHY, EARLY INFANTILE, 17	0.00116836	0.0141103
McCune-Albright Syndrome	0.00233549	0.0141103
Paroxysmal ventricular tachycardia	0.00116836	0.0141103
POLYMICROGYRIA, SYMMETRIC OR ASYMMETRIC	0.00116836	0.0141103
46,XY SEX REVERSAL 6	0.00116836	0.0141103
Constrictive median neuropathy	0.0035014	0.017507
Short fifth metatarsal	0.0035014	0.017507
Malignant melanoma of choroid	0.0035014	0.017507
Malignant melanoma of ciliary body	0.0035014	0.017507
Pseudohypoparathyroidism Type 1B	0.0035014	0.017507
Fibrosis Of Extraocular Muscles, Congenital, 1	0.00466608	0.0198994
Auriculo-condylar syndrome	0.00466608	0.0198994
Acth-Independent Macronodular Adrenal Hyperplasia	0.00466608	0.0198994
Anterior open-bite malocclusion	0.00466608	0.0198994
Malignant melanoma of iris	0.00466608	0.0198994
Pseudohypoparathyroidism	0.00582953	0.0228454
Primary hypercorticolism	0.00582953	0.0228454
ACTH-Secreting Pituitary Adenoma	0.00582953	0.0228454
Endogenous depression	0.00699176	0.0247269
Galactorrhea	0.00699176	0.0247269
Growth Hormone-Secreting Pituitary Adenoma	0.00699176	0.0247269
Chordee	0.00699176	0.0247269
Pituitary Adenoma	0.00815276	0.02627
Dysgerminoma	0.00815276	0.02627
Intestinal Polyposis	0.00815276	0.02627
Gonadoblastoma	0.00815276	0.02627
Swyer Syndrome	0.00931255	0.0281317
Port-Wine Stain	0.00931255	0.0281317
Congenital arteriovenous malformation	0.00931255	0.0281317
Abnormality of the scrotum	0.0104711	0.0286474
Testicular regression syndrome	0.0104711	0.0286474
Testicular dysgenesis	0.0104711	0.0286474
Pituitary growth hormone cell adenoma	0.0104711	0.0286474
Abnormality of the labia	0.0104711	0.0286474
Early infantile epileptic encephalopathy with suppression bursts	0.0116285	0.0301094
Strawberry nevus of skin	0.0116285	0.0301094
Uveal melanoma	0.0116285	0.0301094
Hyperprolactinemia	0.0127846	0.0308961
Prolactinoma	0.0127846	0.0308961
Abnormal sex determination	0.0127846	0.0308961
Atrioventricular Block	0.0127846	0.0308961
Malformations of Cortical Development	0.0139395	0.0331348
Hyperparathyroidism	0.0150932	0.0341955
Polycystic Ovary Syndrome	0.0146723	0.0341955
Pseudohypoaldosteronism	0.0150932	0.0341955
Rudimentary vagina	0.0162457	0.0356912
Hypoplasia of vagina	0.0162457	0.0356912
Hyperthyroidism	0.0173969	0.0365587
Urogenital sinus anomaly	0.0173969	0.0365587
Streak ovary	0.0173969	0.0365587
Linear atrophy	0.018547	0.0381004
Cerebral atrophy	0.0186561	0.0381004
Capuchin ears	0.0196958	0.0391218
Sclerocystic Ovaries	0.0196958	0.0391218
Hyperphosphatemia (disorder)	0.0208434	0.0397671
Acromegaly	0.0208434	0.0397671
Cafe au lait spots, multiple	0.0208434	0.0397671
Hydrophthalmos	0.0219899	0.0398566
Gonadal Dysgenesis, Mixed	0.0219899	0.0398566
Male Pseudohermaphroditism	0.0219899	0.0398566
Pure gonadal dysgenesis	0.0219899	0.0398566
Gonadal Dysgenesis	0.0231351	0.0414146
Osteosclerosis	0.0277039	0.0483983
Ambiguous Genitalia	0.0277039	0.0483983
#Cluster 5
Disease Name	p-value	corr p-value
Intestinal Polyposis	2.0586e-05	0.00516708
Hyperthyroidism	0.000102482	0.0124735
Cafe au lait spots, multiple	0.000149086	0.0124735
Thyrotoxicosis due to pituitary thyroid hormone resistance	0.00210207	0.0128687
Multiple, subcutaneous nodules	0.00141808	0.0128687
Hypothyroidism	0.001173	0.0128687
Polyostotic fibrous dysplasia	0.00210207	0.0128687
Dysplastic gangliocytoma of cerebellum (Lhermitte-Duclos)	0.00105152	0.0128687
Osteoma cutis	0.00210207	0.0128687
Intussusception	0.00210207	0.0128687
Trichilemmoma	0.00105152	0.0128687
Anus, Imperforate	0.000993228	0.0128687
Abnormality of the large intestine	0.00105152	0.0128687
MACROCEPHALY/AUTISM SYNDROME	0.00210207	0.0128687
Abnormality of the parathyroid gland	0.00105152	0.0128687
Cholangiocarcinoma	0.000315307	0.0128687
Proteus-Like Syndrome (disorder)	0.00105152	0.0128687
Lymphangioma	0.00210207	0.0128687
Anisometropia	0.00105152	0.0128687
VACTERL Association With Hydrocephalus	0.00210207	0.0128687
MICROCEPHALY AND CHORIORETINOPATHY, AUTOSOMAL RECESSIVE, 1	0.00210207	0.0128687
Albright's hereditary osteodystrophy	0.00210207	0.0128687
Osteoma	0.00210207	0.0128687
CHROMOSOME 10q22.3-q23.2 DELETION SYNDROME	0.00210207	0.0128687
Chorioretinal dysplasia	0.00210207	0.0128687
Pseudohypoparathyroidism Type 1C	0.00210207	0.0128687
IMMUNODEFICIENCY 15	0.00105152	0.0128687
Lhermitte-Duclos disease	0.00105152	0.0128687
Fibrous Dysplasia, Monostotic	0.00210207	0.0128687
Pseudopapilledema	0.00105152	0.0128687
Pseudopseudohypoparathyroidism	0.00210207	0.0128687
GLIOMA SUSCEPTIBILITY 2	0.00105152	0.0128687
Dysplastic Nevus	0.00105152	0.0128687
Pseudohypoparathyroidism, Type Ia	0.00210207	0.0128687
Proteus Syndrome	0.00210207	0.0128687
Hypocalcemic tetany	0.00210207	0.0128687
Ovarian Cysts	0.000828057	0.0128687
Bannayan-Riley-Ruvalcaba Syndrome	0.00105152	0.0128687
McCune-Albright Syndrome	0.00210207	0.0128687
Acrokeratosis	0.00210207	0.0128687
Lipomatosis	0.00105152	0.0128687
Constrictive median neuropathy	0.00315163	0.0152127
Short fifth metatarsal	0.00315163	0.0152127
Benign neoplasm of eye, unspecified	0.00315163	0.0152127
Dermoid choristoma of eye proper	0.00315163	0.0152127
Pseudohypoparathyroidism Type 1B	0.00315163	0.0152127
Fibroadenoma of breast	0.00315163	0.0152127
Shagreen patch	0.00315163	0.0152127
Upper limb asymmetry	0.00315163	0.0152127
Congenital bronchogenic cyst	0.00315163	0.0152127
Varicocele	0.00315163	0.0152127
Thrombophlebitis	0.00315163	0.0152127
Reperfusion Injury	0.00343169	0.016252
Acth-Independent Macronodular Adrenal Hyperplasia	0.0042002	0.0175709
Congenital macrodactylia	0.0042002	0.0175709
Juvenile polyposis syndrome	0.0042002	0.0175709
Thyroiditis	0.0042002	0.0175709
Angiokeratoma	0.0042002	0.0175709
Venous Insufficiency	0.0042002	0.0175709
Familial meningioma	0.0042002	0.0175709
Impaired cognition	0.00507346	0.0185521
Aqueductal Stenosis	0.0052478	0.0185521
Hyperostosis	0.0052478	0.0185521
Primary hypercorticolism	0.0052478	0.0185521
ACTH-Secreting Pituitary Adenoma	0.0052478	0.0185521
Pseudohypoparathyroidism	0.0052478	0.0185521
NEVUS, EPIDERMAL (disorder)	0.0052478	0.0185521
Hashimoto Disease	0.0052478	0.0185521
LEOPARD Syndrome	0.0052478	0.0185521
Endometrial Hyperplasia	0.0052478	0.0185521
Mental impairment	0.00497955	0.0185521
Endometrial Carcinoma	0.00629442	0.0207881
Galactorrhea	0.00629442	0.0207881
Endogenous depression	0.00629442	0.0207881
Hyperkyphosis	0.00605774	0.0207881
Growth Hormone-Secreting Pituitary Adenoma	0.00629442	0.0207881
Squamous cell carcinoma	0.00658035	0.0214502
Follicular thyroid carcinoma	0.00734006	0.0219328
Pituitary Adenoma	0.00734006	0.0219328
Angioid Streaks	0.00734006	0.0219328
Abnormality of the penis	0.00734006	0.0219328
Thyroid cancer, follicular	0.00734006	0.0219328
Conjunctival hamartoma	0.00734006	0.0219328
Hepatocellular Adenoma	0.00734006	0.0219328
Long QT Syndrome	0.00838472	0.0233841
Polyp of large intestine	0.00838472	0.0233841
Testicular Hydrocele	0.00838472	0.0233841
Hyperoxaluria	0.00838472	0.0233841
Communicating Hydrocephalus	0.00838472	0.0233841
Congenital arteriovenous malformation	0.00838472	0.0233841
Thyroid Gland Follicular Adenoma	0.0094284	0.0251758
SPINOCEREBELLAR ATAXIA 17	0.0094284	0.0251758
Pituitary growth hormone cell adenoma	0.0094284	0.0251758
Subcutaneous lipomas	0.0094284	0.0251758
Hamartoma Syndrome, Multiple	0.0104711	0.0257671
Gastrointestinal hamartomatous polyps	0.0104711	0.0257671
Haemorrhage subcutaneous	0.0104711	0.0257671
Abnormal lung lobation	0.0104711	0.0257671
Nonmedullary Thyroid Carcinoma	0.0104711	0.0257671
Hamartomatous polyp	0.0104711	0.0257671
Strawberry nevus of skin	0.0104711	0.0257671
Uveal melanoma	0.0104711	0.0257671
Hyperprolactinemia	0.0115128	0.0262702
Cranial nerve palsies	0.0115128	0.0262702
Hand polydactyly	0.0115128	0.0262702
Prolactinoma	0.0115128	0.0262702
Common Variable Immunodeficiency	0.0115128	0.0262702
Prostatic Intraepithelial Neoplasias	0.0115128	0.0262702
Accessory nipple	0.0115128	0.0262702
Malignant neoplasm of prostate	0.0115128	0.0262702
Osteoporosis	0.0121664	0.0275113
Genu recurvatum	0.0125536	0.0281335
Hyperparathyroidism	0.0135934	0.029669
Visceral angiomatosis	0.0135934	0.029669
Pseudohypoaldosteronism	0.0135934	0.029669
Mucosal telangiectasiae	0.0146322	0.0313904
Hereditary Breast and Ovarian Cancer Syndrome	0.0146322	0.0313904
Diverticular disease of colon	0.01567	0.0325056
MELANOMA, CUTANEOUS MALIGNANT, 1	0.01567	0.0325056
Multiple lipomata	0.01567	0.0325056
Congenital deafness	0.0154511	0.0325056
Linear atrophy	0.0167069	0.0332812
Agammaglobulinemia	0.0167069	0.0332812
Multiple vertebral anomalies	0.0167069	0.0332812
Abnormal vertebral bodies	0.0167069	0.0332812
Thumb aplasia	0.0167069	0.0332812
Transitional cell carcinoma of bladder	0.0177428	0.0343749
Malignant Squamous Cell Neoplasm	0.0177428	0.0343749
Fissured tongue	0.0177428	0.0343749
Epilepsy	0.0178038	0.0343749
Fibrous skin tumor of tuberous sclerosis	0.0187777	0.0351732
Sebaceous adenoma	0.0187777	0.0351732
Hyperphosphatemia (disorder)	0.0187777	0.0351732
Acromegaly	0.0187777	0.0351732
Nasopharyngeal carcinoma	0.0198117	0.0365642
Nevus	0.0198117	0.0365642
Hemangioma, Cavernous	0.0208446	0.0379131
Acanthosis Nigricans	0.0208446	0.0379131
Pulmonary Embolism	0.0218767	0.0392217
Gross motor development delay	0.0218767	0.0392217
Idiopathic thrombocytopenia	0.0229077	0.0399294
Autoimmune thrombocytopenia	0.0229077	0.0399294
Lymphedema	0.0229077	0.0399294
Lipoma	0.0229077	0.0399294
Recurrent bronchitis	0.0239378	0.0411533
Meningioma	0.0239378	0.0411533
Osteosclerosis	0.0249669	0.0415013
Immune thrombocytopenic purpura	0.0249669	0.0415013
Intracranial Hypertension	0.0249669	0.0415013
Cataract	0.0249456	0.0415013
Hemangioma	0.0249669	0.0415013
Mental Retardation	0.0259009	0.0420952
Papilloma	0.0259951	0.0420952
Mental deficiency	0.0259009	0.0420952
Liver carcinoma	0.0255298	0.0420952
Breast Carcinoma	0.0270223	0.0434781
Sezary Syndrome	0.0280485	0.044558
Purpura	0.0280485	0.044558
Polydactyly	0.0290738	0.0456095
Precocious Puberty	0.0290738	0.0456095
Chronic diarrhea	0.0311214	0.0481298
Strabismus	0.0312556	0.0481298
Squamous cell carcinoma of the head and neck	0.0311214	0.0481298
Malformations of Cortical Development, Group II	0.0321438	0.0488975
Obesity	0.0321129	0.0488975
#Cluster 6
Disease Name	p-value	corr p-value
Unilateral cleft palate	0.00479028	0.0441604
Hypoplasia of the maxilla	0.00378764	0.0441604
Trigeminal Neuralgia	0.00143349	0.0441604
MITOCHONDRIAL COMPLEX V (ATP SYNTHASE) DEFICIENCY, NUCLEAR TYPE 4	0.00479028	0.0441604
COWDEN SYNDROME 6	0.00479028	0.0441604
Peliosis Hepatis	0.00479028	0.0441604
Mandibular hyperostosis	0.00479028	0.0441604
Myocardial Ischemia	0.000151403	0.0441604
OROFACIAL CLEFT 10	0.00479028	0.0441604
Caudal Duplication Anomaly	0.00479028	0.0441604
Unilateral cleft lip	0.00479028	0.0441604
Substance Withdrawal Syndrome	0.00213628	0.0441604
DIABETES MELLITUS, INSULIN-DEPENDENT, 22 (disorder)	0.00479028	0.0441604
Absent tragus	0.00479028	0.0441604
West Nile Fever	0.00479028	0.0441604
SPINOCEREBELLAR ATAXIA, AUTOSOMAL RECESSIVE 16	0.00479028	0.0441604
Insulin-Like Growth Factor I, Resistance To	0.00479028	0.0441604
Single major depressive episode	0.000789056	0.0441604
WHIM syndrome	0.00479028	0.0441604
Mastitis	0.00479028	0.0441604
Bleeding Disorder Due To P2RY12 Defect	0.00479028	0.0441604
Gastroenteritis	0.00479028	0.0441604
Depigmentation/hyperpigmentation of skin	0.00479028	0.0441604
LICHTENSTEIN-KNORR SYNDROME	0.00479028	0.0441604
Orbital craniosynostosis	0.00479028	0.0441604
CEROID LIPOFUSCINOSIS, NEURONAL, 6	0.000331784	0.0441604
COMBINED OXIDATIVE PHOSPHORYLATION DEFICIENCY 22	0.00479028	0.0441604
Growth and mental retardation, mandibulofacial dysostosis, microcephaly, and cleft palate	0.00479028	0.0441604
Epileptic encephalopathy, Lennox-Gastaut type	0.00479028	0.0441604
Juvenile arthritis	0.00333136	0.0441604
Sepsis	0.00443838	0.0441604
Paranoid Schizophrenia	0.00326318	0.0441604
Acute kidney injury	0.00503031	0.0449679
#Cluster 7
Disease Name	p-value	corr p-value
Schizophrenia	5.33466e-09	2.34725e-06
Mental Depression	4.94823e-06	0.00108861
Depressive disorder	1.92386e-05	0.00282166
Psychoses, Substance-Induced	3.42307e-05	0.00376538
Angle class 2 malocclusion	6.26456e-05	0.00459401
Malocclusion	6.26456e-05	0.00459401
Agoraphobia	8.60835e-05	0.00541096
Neurogenic Urinary Bladder	0.000214171	0.0117794
Severe depression	0.000397859	0.0194509
Heroin Dependence	0.000510299	0.0224532
MELANOMA, CUTANEOUS MALIGNANT, SUSCEPTIBILITY TO, 3	0.00385559	0.0249479
Short chordae tendineae of the mitral valve	0.00385559	0.0249479
HYPOCALCIURIC HYPERCALCEMIA, FAMILIAL, TYPE II (disorder)	0.00385559	0.0249479
Organic writer's cramp	0.000636335	0.0249479
PALMOPLANTAR KERATODERMA AND CONGENITAL ALOPECIA 1	0.00385559	0.0249479
Squamous cell carcinoma	0.00109824	0.0249479
Long phalanx of finger	0.00385559	0.0249479
2-4 toe cutaneous syndactyly	0.00385559	0.0249479
Phakomatosis cesiomarmorata	0.00385559	0.0249479
Congenital dysplasia of cardiac valve	0.00385559	0.0249479
Substance Withdrawal Syndrome	0.00113301	0.0249479
FG SYNDROME 2	0.00385559	0.0249479
Periventricular Heterotopia, X-Linked	0.00385559	0.0249479
Left ventricular noncompaction	0.00127445	0.0249479
Underdeveloped superior crus of antihelix	0.00385559	0.0249479
SCHIZOPHRENIA 12	0.00385559	0.0249479
Congenital dislocation of radial head	0.00127445	0.0249479
Kaposiform Hemangioendothelioma	0.00385559	0.0249479
MENTAL RETARDATION, AUTOSOMAL RECESSIVE 5	0.00385559	0.0249479
Oculo-dento-digital syndrome	0.00385559	0.0249479
Heart failure	0.00383994	0.0249479
Congenital visual impairment	0.00385559	0.0249479
Pemphigoid, Benign Mucous Membrane	0.00385559	0.0249479
4-5 finger syndactyly	0.00385559	0.0249479
Capillary Leak Syndrome	0.00385559	0.0249479
Abnormality of the fifth metatarsal bone	0.00385559	0.0249479
Heterotopia, Periventricular, Ehlers-Danlos Variant	0.00385559	0.0249479
Neuronal intestinal pseudoobstruction	0.00385559	0.0249479
PARAGANGLIOMAS 5	0.00385559	0.0249479
Cardiomyopathy, Familial Hypertrophic, 11	0.00385559	0.0249479
Bulbous tips of toes	0.00385559	0.0249479
Persistent pupillary membranes	0.00385559	0.0249479
Coat hanger sign of ribs	0.00385559	0.0249479
Craniometaphyseal dysplasia, autosomal recessive type	0.00385559	0.0249479
Microstomia	0.00326334	0.0249479
Ovarian Hyperstimulation Syndrome	0.00385559	0.0249479
Short chordae tendineae of the tricuspid valve	0.00385559	0.0249479
Immunodeficiency due to Defect in CD3-Zeta	0.00385559	0.0249479
Tufted angioma of skin	0.00385559	0.0249479
Atrial Septal Defect 5	0.00385559	0.0249479
Oculodentodigital Dysplasia, Autosomal Recessive	0.00385559	0.0249479
Hallermann's Syndrome	0.00385559	0.0249479
Undulate clavicles	0.00385559	0.0249479
Xerosis	0.00303139	0.0249479
Melnick-Needles Syndrome	0.00385559	0.0249479
Fifth finger distal phalanx clinodactyly	0.00385559	0.0249479
Trigeminal Neuralgia	0.000928798	0.0249479
MENTAL RETARDATION, AUTOSOMAL DOMINANT 36	0.00385559	0.0249479
OTOPALATODIGITAL SYNDROME, TYPE II	0.00385559	0.0249479
CARDIOMYOPATHY, DILATED, 1R	0.00385559	0.0249479
Meretoja syndrome	0.00385559	0.0249479
CARDIOMYOPATHY, DILATED, 1GG	0.00385559	0.0249479
Dyskinetic syndrome	0.00167251	0.0249479
Cardiac valvular dysplasia, X-linked	0.00385559	0.0249479
Congestive heart failure	0.00303139	0.0249479
CHROMOSOME 16p13.3 DELETION SYNDROME, PROXIMAL	0.00385559	0.0249479
HYPOCALCEMIA, AUTOSOMAL DOMINANT 2	0.00385559	0.0249479
SYNDACTYLY, TYPE III	0.00385559	0.0249479
Nonorganic psychosis	0.00402365	0.0256581
Anhedonia	0.0047642	0.0299464
Epilepsy	0.00497927	0.0308575
Hypotrichosis	0.00511835	0.0312788
Tricuspid Valve Prolapse	0.00769676	0.0345569
ATRIOVENTRICULAR SEPTAL DEFECT 3	0.00769676	0.0345569
Pectus excavatum	0.00654876	0.0345569
Accessory carpal bone	0.00769676	0.0345569
Dubowitz syndrome	0.00769676	0.0345569
Congenital hypoplasia of aortic arch	0.00769676	0.0345569
Abnormality of refraction	0.00769676	0.0345569
Stenosis of ureter	0.00769676	0.0345569
Stress/infection-induced lactic acidosis	0.00769676	0.0345569
Radial deviation of thumb terminal phalanx	0.00769676	0.0345569
Congenital idiopathic intestinal pseudoobstruction	0.00769676	0.0345569
Irregular metacarpals	0.00769676	0.0345569
Frontometaphyseal dysplasia	0.00769676	0.0345569
High axial triradius	0.00769676	0.0345569
Common atrioventricular canal	0.00769676	0.0345569
Schwartz-Lelek syndrome	0.00769676	0.0345569
HYPOCALCEMIA, AUTOSOMAL DOMINANT 1	0.00769676	0.0345569
Phakomatosis cesioflammea	0.00769676	0.0345569
Short distal phalanx of hallux	0.00769676	0.0345569
Terminal Osseous Dysplasia and Pigmentary Defects	0.00769676	0.0345569
Penile hypospadias	0.00769178	0.0345569
Marijuana Abuse	0.00748755	0.0345569
Broad phalanges of the hand	0.00769676	0.0345569
Oto-Palato-digital syndrome type 1	0.00769676	0.0345569
Congenital alopecia totalis	0.00769676	0.0345569
Rubinstein-Taybi Syndrome	0.00769676	0.0345569
Dental Enamel Hypoplasia	0.0083682	0.037192
Bilateral fifth finger clinodactyly	0.00851551	0.0374682
Speech Delay	0.00984545	0.0387051
Liposarcoma, well differentiated	0.0115236	0.0387051
Malignant melanoma of choroid	0.0115236	0.0387051
Familial Amyloid Polyneuropathy, Type V	0.0115236	0.0387051
Clinodactyly of toes	0.0115236	0.0387051
LEFT VENTRICULAR NONCOMPACTION 10	0.0102617	0.0387051
Prominent epicanthal folds	0.0115236	0.0387051
Malignant melanoma of ciliary body	0.0115236	0.0387051
Patchy palmoplantar keratoderma	0.0115236	0.0387051
Vascular ring	0.0115236	0.0387051
LONG QT SYNDROME 15	0.0115236	0.0387051
Dens evaginatus	0.0115236	0.0387051
Respiratory complex II deficiency	0.0115236	0.0387051
Abnormal foot bone ossification	0.0115236	0.0387051
Sleep Initiation and Maintenance Disorders	0.0115236	0.0387051
Simple ear	0.0107621	0.0387051
Talon cusp	0.0115236	0.0387051
Liposarcoma, Dedifferentiated	0.0115236	0.0387051
Papillary cystadenoma of the epididymis	0.0115236	0.0387051
Fifth finger camptodactyly	0.0115236	0.0387051
Cor pulmonale	0.0115236	0.0387051
Coronary Aneurysm	0.0115236	0.0387051
VENTRICULAR TACHYCARDIA, CATECHOLAMINERGIC POLYMORPHIC, 4	0.0115236	0.0387051
Partial/complete duplication of the phalanges of the hallux	0.0115236	0.0387051
Abnormal ossification involving bones of the feet	0.0115236	0.0387051
Cerebral cortex myoclonus	0.0115236	0.0387051
LEFT VENTRICULAR NONCOMPACTION 8	0.0102617	0.0387051
Ostium primum atrial septal defect	0.0115236	0.0387051
Idiopathic pulmonary arterial hypertension	0.0102617	0.0387051
Pulmonary arterial hypertension	0.0102617	0.0387051
LONG QT SYNDROME 14	0.0115236	0.0387051
Cocaine Dependence	0.0123268	0.0407804
Alcohol abuse	0.0123268	0.0407804
Blepharoptosis	0.0126669	0.0415929
Syndactyly of the toes	0.0128693	0.0419443
Abnormality of the metaphyses	0.0145582	0.0459039
Camptodactyly of toe	0.0153361	0.0459039
Intestinal Pseudo-Obstruction	0.0153361	0.0459039
Periventricular Nodular Heterotopia	0.0153361	0.0459039
Chorioretinal dystrophy	0.0153361	0.0459039
Tricuspid Valve Insufficiency	0.0153361	0.0459039
Mitochondrial Complex II Deficiency	0.0153361	0.0459039
liposarcoma	0.0153361	0.0459039
Chromosome 2q37 deletion syndrome	0.0153361	0.0459039
Erythrokeratodermia variabilis	0.0153361	0.0459039
fibroma	0.0153361	0.0459039
Malignant melanoma of iris	0.0153361	0.0459039
#Cluster 8
Disease Name	p-value	corr p-value
Epilepsy, Temporal Lobe	1.69533e-08	1.18673e-07
Alcoholic Intoxication, Chronic	3.93149e-05	0.000137602
Schizophrenia	0.00181024	0.00422389
Psychoses, Substance-Induced	0.00594751	0.0104081
Bipolar Disorder	0.0104877	0.0146828
Osteosarcoma	0.015345	0.0179025
#Cluster 9
Disease Name	p-value	corr p-value
LONG QT SYNDROME 14	9.81891e-06	0.000272475
LONG QT SYNDROME 15	9.81891e-06	0.000272475
VENTRICULAR TACHYCARDIA, CATECHOLAMINERGIC POLYMORPHIC, 4	9.81891e-06	0.000272475
Hereditary Diffuse Gastric Cancer	9.81891e-06	0.000272475
Phencyclidine Abuse	9.11445e-05	0.00144529
Severe depression	9.11445e-05	0.00144529
VENTRICULAR TACHYCARDIA, CATECHOLAMINERGIC POLYMORPHIC, 1 (disorder)	6.8433e-05	0.00144529
Cardiac Arrest	0.000213905	0.00296793
Romano-Ward Syndrome	0.000339192	0.00418337
Tachycardia, Ventricular	0.000882884	0.00980001
MENTAL RETARDATION, AUTOSOMAL DOMINANT 38	0.00186938	0.010375
Schizophrenia	0.00165864	0.010375
Macular Dystrophy, Butterfly-Shaped Pigmentary, 2	0.00186938	0.010375
ACROFACIAL DYSOSTOSIS, CINCINNATI TYPE	0.00186938	0.010375
TAKENOUCHI-KOSAKI SYNDROME	0.00186938	0.010375
Urethral obstruction sequence	0.00186938	0.010375
EVEN-PLUS SYNDROME	0.00186938	0.010375
EPILEPTIC ENCEPHALOPATHY, EARLY INFANTILE, 33	0.00186938	0.010375
Marijuana Abuse	0.0017751	0.010375
Prune Belly Syndrome	0.00186938	0.010375
Alcohol Withdrawal Delirium	0.00373548	0.0165855
Congenital posterior urethral valves	0.00373548	0.0165855
Burn-Mckeown syndrome	0.00373548	0.0165855
Autosomal recessive sideroblastic anemia	0.00373548	0.0165855
Bilateral choanal atresia	0.00373548	0.0165855
Carcinoma, Lobular	0.00559831	0.0207137
Microphthalmia, Syndromic 5	0.00559831	0.0207137
Hip Dysplasia	0.00559831	0.0207137
Autosomal dominant hypohidrotic ectodermal dysplasia syndrome (disorder)	0.00559831	0.0207137
Patterned dystrophy of retinal pigment epithelium	0.00559831	0.0207137
Parkinson Disease	0.006174	0.0221069
Gastritis, Atrophic	0.00745787	0.0258695
Patent ductus arteriosus	0.00883508	0.029718
Ovarian papillary adenocarcinoma	0.00931417	0.030408
Endometrial Carcinoma	0.0111672	0.035416
Alzheimer's Disease	0.0116712	0.0359861
Dysgerminoma	0.013017	0.0390511
Bipolar Disorder	0.0133782	0.0390784
Invasive Ductal Breast Carcinoma	0.0167069	0.0475504
#Cluster 10
Disease Name	p-value	corr p-value
Omodysplasia 2	0.00058418	0.00394322
Keratoconus	0.000525695	0.00394322
Abnormality of the retinal vasculature	0.000460987	0.00394322
RETINITIS PIGMENTOSA 44	0.00058418	0.00394322
Congenital hypoplasia of penis	8.7223e-05	0.00394322
Night Blindness, Congenital Stationary, Autosomal Dominant 1	0.00058418	0.00394322
Nystagmus	0.000485046	0.00394322
Retinitis Pigmentosa 4	0.00058418	0.00394322
Hyperinsulinism	0.00100132	0.00600791
Conductive hearing loss	0.00199133	0.00741732
Glaucoma	0.00189632	0.00741732
Fundus Albipunctatus	0.00233508	0.00741732
Retinitis punctata albescens (disorder)	0.00233508	0.00741732
Hypogonadism	0.00205591	0.00741732
Progressive cone dystrophy (without rod involvement)	0.00233508	0.00741732
Blindness, Legal	0.00162487	0.00741732
Achromatopsia 1	0.00175172	0.00741732
Low Vision	0.00403647	0.0114524
OROFACIODIGITAL SYNDROME VI	0.0046658	0.0114524
Retinitis Pigmentosa	0.00412704	0.0114524
Dyschromatopsia	0.0046658	0.0114524
Achromatopsia	0.0046658	0.0114524
Oguchi disease	0.00582953	0.0125918
Night blindness, stationary	0.00582953	0.0125918
Night blindness, congenital stationary, complete	0.00582953	0.0125918
Retinal Dysplasia	0.00641098	0.0130581
Optic Atrophy	0.00652904	0.0130581
Hypoplasia of optic disc	0.00699216	0.0134849
Cataract	0.0074645	0.0138994
Nystagmus, continuous pendular	0.00873408	0.0147388
Night blindness, congenital stationary	0.00873408	0.0147388
Pendular Nystagmus	0.00873408	0.0147388
Abnormality of macular pigmentation	0.00931417	0.0147931
Bifid scrotum	0.00931417	0.0147931
Obesity	0.00971422	0.0149876
Sensorineural Hearing Loss (disorder)	0.0110503	0.0165755
Severe myopia	0.012789	0.0186651
Exotropia	0.0145228	0.0206377
Rhizomelia	0.0151002	0.020908
Congenital hypoplasia of kidney	0.0185588	0.0250544
Congenital ocular coloboma (disorder)	0.0231552	0.0304971
Syndactyly	0.0243016	0.0312449
Hyperopia	0.0271629	0.0332812
facial deformity	0.0277343	0.0332812
Ulnar polydactyly of fingers	0.0271629	0.0332812
#Cluster 11
Disease Name	p-value	corr p-value
Cocaine Dependence	0.000153968	0.0038492
Retinal Cone Dystrophy 3A	0.000467344	0.00389454
Progressive cone dystrophy	0.000467344	0.00389454
Achromatopsia	0.00373417	0.0186447
Pendular Nystagmus	0.00699298	0.0186447
Alcoholic Intoxication, Chronic	0.00664983	0.0186447
Cocaine Abuse	0.00745787	0.0186447
Nystagmus, continuous pendular	0.00699298	0.0186447
Dyschromatopsia	0.00373417	0.0186447
Autistic Disorder	0.00638498	0.0186447
Cone/cone-rod dystrophy	0.0093158	0.0194079
Cone dystrophy	0.0093158	0.0194079
Exotropia	0.0116345	0.0223741
Depressive disorder	0.0133075	0.0237634
Obsessive-Compulsive Disorder	0.0148739	0.0247899
Alcohol abuse	0.0204087	0.0318886
Hyperopia	0.0217887	0.0320422
#Cluster 12
Disease Name	p-value	corr p-value
Major Depressive Disorder	0.00274398	0.0141463
Unipolar Depression	0.00262075	0.0141463
Autistic Disorder	0.00326452	0.0141463
Adult T-Cell Lymphoma/Leukemia	0.0108277	0.0257213
Diffuse Large B-Cell Lymphoma	0.0118714	0.0257213
Hyperglycemia	0.0115236	0.0257213
Alcohol abuse	0.015345	0.0284979
Medulloblastoma	0.018118	0.0294418
#Cluster 13
Disease Name	p-value	corr p-value
Asthma, Aspirin-Induced	6.38378e-06	0.000338341
Generalized abnormality of skin	0.000350508	0.00309616
Hyper-Immunoglobulin E Syndrome, Autosomal Dominant	0.000350508	0.00309616
BLEEDING DISORDER, PLATELET-TYPE, 13, SUSCEPTIBILITY TO	0.000350508	0.00309616
Hyper-Ige Recurrent Infection Syndrome, Autosomal Dominant	0.000350508	0.00309616
AUTOIMMUNE DISEASE, MULTISYSTEM, INFANTILE-ONSET	0.000350508	0.00309616
Job Syndrome	0.00105128	0.00795968
Ki-1+ Anaplastic Large Cell Lymphoma	0.00140154	0.00928521
Leukemia, T-Cell	0.00175172	0.0103157
T-Cell Lymphoma	0.00455022	0.0162301
Gingivitis	0.00385109	0.0162301
Rhinitis	0.00489966	0.0162301
Precursor B-Cell Lymphoblastic Leukemia-Lymphoma	0.00420069	0.0162301
Copper-Overload Cirrhosis	0.00385109	0.0162301
Lymphatic Metastasis	0.00489966	0.0162301
Paronychia Inflammation	0.00315163	0.0162301
Pulmonary Embolism	0.00734348	0.0228944
Hepatitis, Chronic	0.00804098	0.0236762
Uterine Cervical Neoplasm	0.00908662	0.0249508
Celiac Disease	0.0104797	0.0249508
Adult T-Cell Lymphoma/Leukemia	0.0108277	0.0249508
Eosinophilia	0.0097833	0.0249508
Squamous cell carcinoma of the head and neck	0.0104797	0.0249508
Infarction, Middle Cerebral Artery	0.0115236	0.0254479
Arthritis, Experimental	0.0139565	0.0273962
Congenital diaphragmatic hernia	0.0132618	0.0273962
Memory Disorders	0.0139565	0.0273962
Eczema	0.015345	0.0290459
ear infection chronic	0.018118	0.030008
Medulloblastoma	0.018118	0.030008
Chronic otitis media	0.018118	0.030008
Diabetes Mellitus, Insulin-Dependent	0.0167322	0.030008
Ulcerative Colitis	0.0208858	0.0325573
Atherosclerosis	0.0208858	0.0325573
Enophthalmos	0.0219224	0.0331968
Psoriasis	0.0233034	0.0343078
Pancreatic Neoplasm	0.0305322	0.0425844
Reperfusion Injury	0.0298453	0.0425844
Brain Ischemia	0.0319051	0.0433582
Generalized osteopenia	0.0346469	0.044585
ovarian neoplasm	0.0353315	0.044585
Osteopenia	0.0346469	0.044585
Non-Small Cell Lung Carcinoma	0.0384085	0.0473407
Squamous cell carcinoma	0.0414788	0.0496554
Leukemia, Myelocytic, Acute	0.0421602	0.0496554
#Cluster 14
Disease Name	p-value	corr p-value
Amnesia, Transient Global	0.00210207	0.00513778
Short Stature, Idiopathic, Autosomal	0.000934525	0.00513778
Cataplexy	0.00256889	0.00513778
Ketosis	0.00256889	0.00513778
Narcolepsy-Cataplexy Syndrome	0.00186861	0.00513778
Narcolepsy	0.00490138	0.00816897
Hallucinations	0.00979072	0.0122384
Abnormality of vision	0.00932559	0.0122384
Hypoglycemia	0.0230011	0.0255568
#Cluster 15
Disease Name	p-value	corr p-value
Narrow foramen obturatorium	0.00116809	0.00872121
Scleroderma, Limited	0.00140162	0.00872121
Diffuse Scleroderma	0.00116809	0.00872121
Lipoatrophic Diabetes Mellitus	0.00116809	0.00872121
Familial partial lipodystrophy	0.00116809	0.00872121
Lipodystrophy, Congenital Generalized, Type 3	0.000233672	0.00872121
Allanson Pantzar McLeod syndrome	0.000934525	0.00872121
CREST Syndrome	0.00140162	0.00872121
Glaucoma, Open-Angle	0.00116809	0.00872121
Aortic Aneurysm, Abdominal	0.00210207	0.011066
Potter's facies	0.00233549	0.011066
Diabetic Retinopathy	0.00256889	0.011066
Familial primary pulmonary hypertension	0.00256889	0.011066
Bone Cysts	0.00280226	0.0112091
Mucosal telangiectasiae	0.00326893	0.012204
Acanthosis Nigricans	0.00466826	0.0130704
Essential Hypertension	0.00490138	0.0130704
Acromegaly	0.00420192	0.0130704
Carcinoma, Pancreatic Ductal	0.00466826	0.0130704
Lipoatrophy	0.0044351	0.0130704
Lipodystrophy	0.00396871	0.0130704
Precocious Puberty	0.0065325	0.0166282
Stevens-Johnson Syndrome	0.00699829	0.0170393
Idiopathic pulmonary arterial hypertension	0.00932559	0.019342
Pulmonary arterial hypertension	0.00932559	0.019342
Atrial Fibrillation	0.00886035	0.019342
Hypercholesterolemia	0.00909298	0.019342
Xerostomia	0.00979072	0.0195814
Steatohepatitis	0.0102557	0.0198042
Congenital hypoplasia of lung	0.0111855	0.0208795
Pancreatitis	0.0118825	0.0214651
Arthritis	0.012347	0.0216072
Congenital Bilateral Cataracts	0.0137399	0.0226305
Congenital cataract	0.0137399	0.0226305
Dental caries	0.017218	0.0257313
Liver Failure	0.0169863	0.0257313
Mandibular hyperplasia	0.0181444	0.0257313
Patent ductus arteriosus	0.0179129	0.0257313
Class III malocclusion	0.0181444	0.0257313
Gastroesophageal reflux disease	0.0186075	0.0257313
Pulmonary Fibrosis	0.018839	0.0257313
Contracture	0.022308	0.0265798
Contracture of joint	0.0216147	0.0265798
Hyperinsulinism	0.0202273	0.0265798
Hypertrophic Cardiomyopathy	0.0220769	0.0265798
Flexion contractures of joints	0.0216147	0.0265798
Flexion contracture	0.0216147	0.0265798
ovarian neoplasm	0.0236939	0.0276429
Diabetes Mellitus, Experimental	0.0248481	0.0283978
Heart failure	0.039103	0.0437953
Retinitis Pigmentosa	0.0411635	0.0451992
#Cluster 16
Disease Name	p-value	corr p-value
Rheumatoid Arthritis	0.00118835	0.0207238
Carotid artery aneurysm	0.0012852	0.0207238
Multiple digital exostoses	0.0012852	0.0207238
Congenital absence of ovary	0.0012852	0.0207238
IMMUNODEFICIENCY 31B	0.0012852	0.0207238
CANDIDIASIS, FAMILIAL, 7	0.0012852	0.0207238
Metachondromatosis	0.0012852	0.0207238
IMMUNODEFICIENCY 31A	0.0012852	0.0207238
Acquired hypothyroidism	0.00256889	0.0331387
Cartilaginous exostosis	0.00256889	0.0331387
Anomalous pulmonary artery	0.00513178	0.0354229
Enchondromatosis	0.00641098	0.0354229
Costello syndrome (disorder)	0.00768869	0.0354229
Thyroiditis	0.00513178	0.0354229
Enterocolitis	0.00768869	0.0354229
Cardio-facio-cutaneous syndrome	0.00768869	0.0354229
Amegakaryocytic thrombocytopenia	0.00768869	0.0354229
Herpes encephalitis	0.00768869	0.0354229
Delayed menarche	0.00385109	0.0354229
Hereditary Multiple Exostoses	0.00385109	0.0354229
Severe sensorineural hearing impairment	0.00641098	0.0354229
LEOPARD Syndrome	0.00641098	0.0354229
Neurofibrosarcoma	0.00641098	0.0354229
Extravasation of Diagnostic and Therapeutic Materials	0.00768869	0.0354229
Malignant Peripheral Nerve Sheath Tumor	0.00513178	0.0354229
Generalized osteoporosis with pathologic fractures	0.00768869	0.0354229
Complete atrioventricular block	0.00513178	0.0354229
Factor XII Deficiency	0.00641098	0.0354229
Synovitis	0.0089649	0.0398783
Brain Aneurysm	0.0102396	0.0412784
Cerebral arterial aneurysm	0.0102396	0.0412784
Bundle-Branch Block	0.0102396	0.0412784
Renal Artery Stenosis	0.0115128	0.0436811
Subaortic stenosis	0.0115128	0.0436811
Multiple lentigines	0.0127846	0.0445733
Hypertension, Renovascular	0.0127846	0.0445733
Senile lentigo	0.0127846	0.0445733
Candidiasis, Chronic Mucocutaneous	0.0140548	0.0477124
